# Supplementary material
Source: MDPI journal article supplement (https://www.mdpi.com/2311-7524/10/5/486)
Supplement: s1 [file s1]

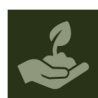

# Phenolic Profiles of Six Unexplored Asteraceae Species from Asia: Comparison of Wild and Cultivated Plants

Daniil N. Olennikov <sup>1,\*</sup>, Nadezhda K. Chirikova <sup>2</sup>

<sup>1</sup> Laboratory of Medical and Biological Research, Institute of General and Experimental Biology, Siberian Division, Russian Academy of Science, 6 Sakhyanovoy Street, 670047 Ulan-Ude, Russia

<sup>2</sup> Department of Biochemistry and Biotechnology, North-Eastern Federal University, 58 Belinsky Street, 677027 Yakutsk, Russia

\* Correspondence: olennikovdn@mail.ru; Tel.: +7-902-160-06-27

## Supplementary content

**Figure S1.** Typical UV spectra of the basic phenolic compounds found in six Asteraceae species.

**Figure S2.** Flow chart for the experimental design.

**Figure S3.** HPLC-MS chromatograms of *Artemisia jacutica* herb in SIM mode.

**Figure S4.** HPLC-MS chromatograms of *Carduus nutans* subsp. *leiophyllus* herb in SIM mode.

**Figure S5.** HPLC-MS chromatograms of *Cirsium heterophyllum* herb in SIM mode.

**Figure S6.** HPLC-MS chromatograms of *Echinops davuricus* herb in SIM mode.

**Figure S7.** HPLC-MS chromatograms of *Ixeris chinensis* subsp. *versicolor* herb in SIM mode.

**Figure S8.** HPLC-MS chromatograms of *Lactuca sibirica* herb in SIM mode.

**Table S1.** Description of wild samples of Asteraceae species collected in Altacheiskii reserve for a period 2010–2020 and information on cultivation success.

**Table S2.** Plant cultivation conditions of six Asteraceae species.

**Table S3.** Plant sample description for HPLC assay.

**Table S4.** Reference standards used for HPLC profiling and quantification.

**Table S5.** HPLC and mass-spectral conditions used for metabolite separation

**Table S6.** Regression equations, correlation coefficients, standard deviation, limits of detection, limits of quantification and linear ranges for 55 reference standards.

**Table S7.** Retention times, molecular formulas, mass-spectral data for negative ionization, and identification level of compounds Aj-1–Aj-32 found in *Artemisia jacutica* herb.

**Table S8.** Retention times, molecular formulas, mass-spectral data for negative ionization, and identification level of compounds Cn-1–Cn-20 found in *Carduus nutans* subsp. *leiophyllus* herb.

**Table S9.** Extraction/chromatography conditions and spectral data of luteolin 7-O-(2''-O-(6'''-O-acetyl)-glucosyl)-glucoside and chrysoeriol 7-O-(2''-O-(6'''-O-acetyl)-glucosyl)-glucoside isolated from *Carduus nutans* subsp. *leiophyllus* leaves.

**Table S10.** Retention times, molecular formulas, mass-spectral data for negative ionization, and identification level of compounds Ch-1–Ch-24 found in *Cirsium heterophyllum* herb.

**Table S11.** Retention times, molecular formulas, mass-spectral data for negative ionization, and identification level of compounds El-1–El-19 found in *Echinops davuricus* herb.

**Table S12.** Retention times, molecular formulas, mass-spectral data for negative ionization, and identification level of compounds Ic-1–Ic-25 found in *Ixeris chinensis* subsp. *versicolor* herb.

**Table S13.** Retention times, molecular formulas, mass-spectral data for negative ionization, and identification level of compounds Ls-1–Ls-41 found in *Lactuca sibirica* herb.

**Table S14.** Synopsis of compounds found in six Asteraceae species.

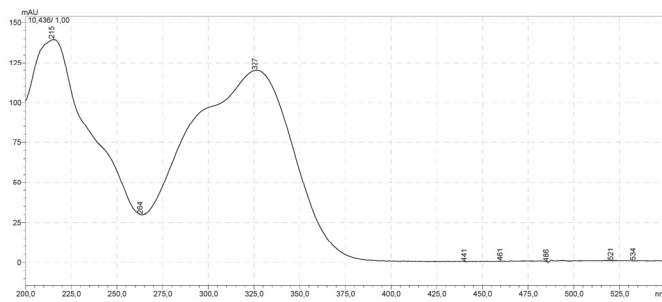Caffeoyl-quinic acids, *trans*-; dicaffeoyl-quinic acids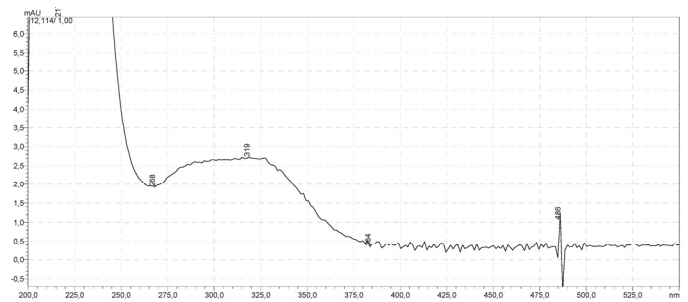Caffeoyl-quinic acids, *cis*-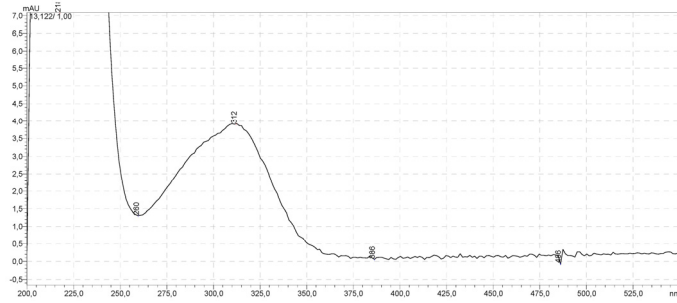*p*-Coumaroyl-quinic acids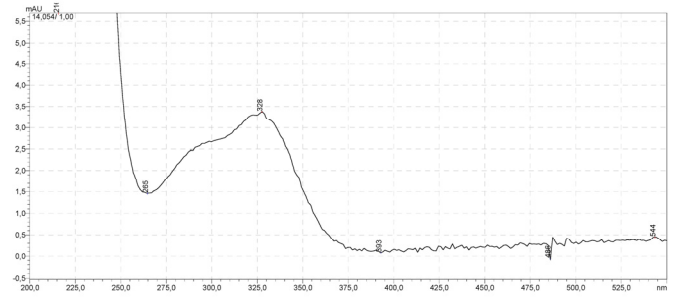

Feruloyl-quinic acids

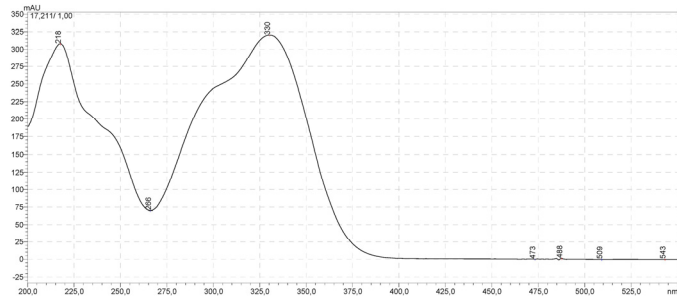Cichoric acid, *trans,trans*-; caftaric acid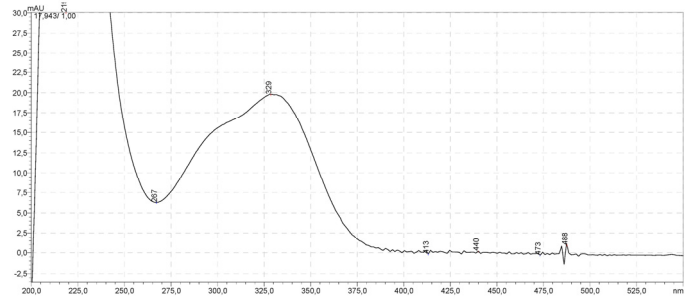Cichoric acid, *cis,trans*-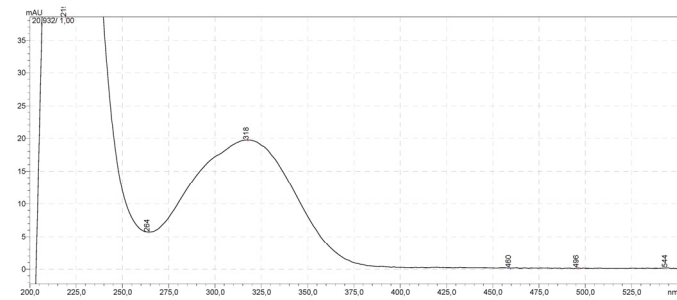*p*-Coumaroyl-caftaric acid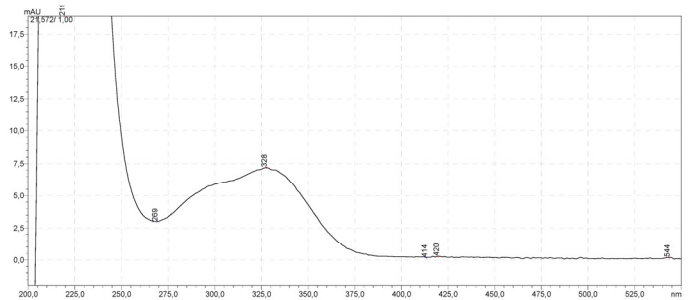

Feruloyl-caftaric acid

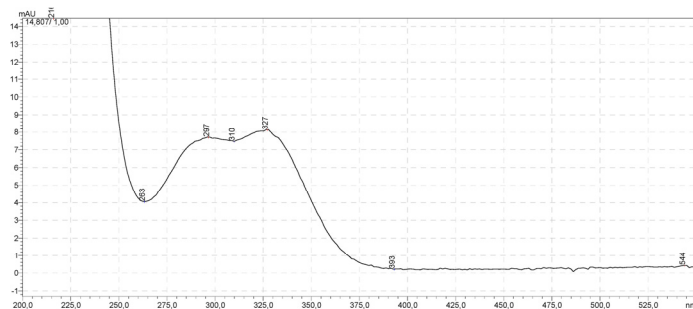

Vanilloyl quinic acids, divanilloyl quinic acids

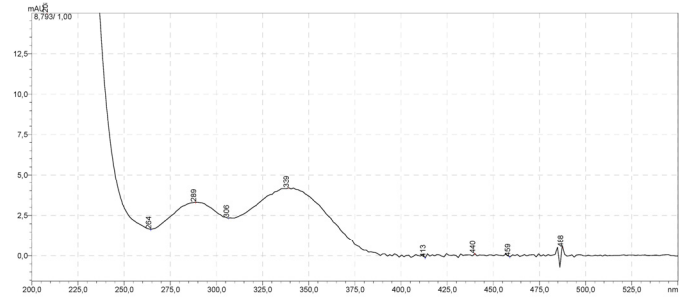

Cichoriin

**Figure S1.** Typical UV spectra of the basic phenolic compounds found in six Asteraceae species.

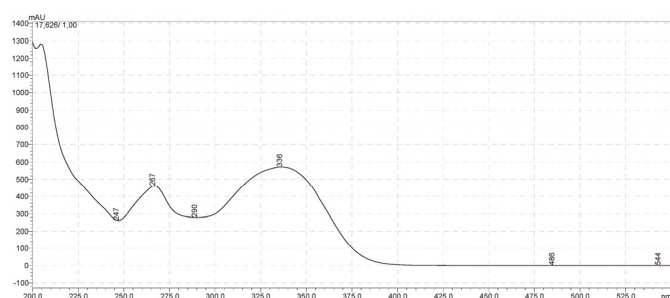

Apigenin 7-O-glycosides

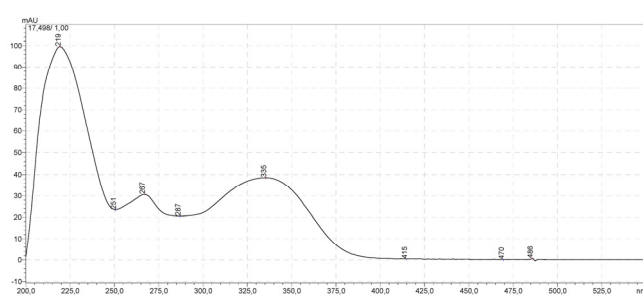

Acacetin/pectolinarigenin 7-O-glycosides

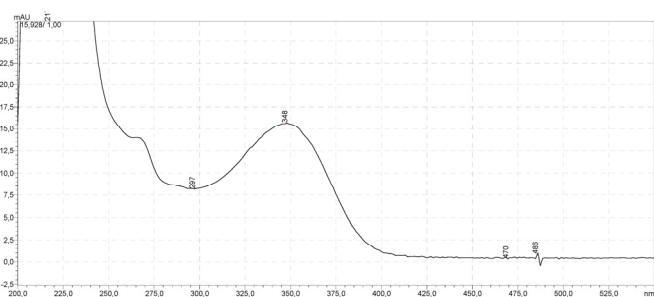

Luteolin 7-O-glycosides

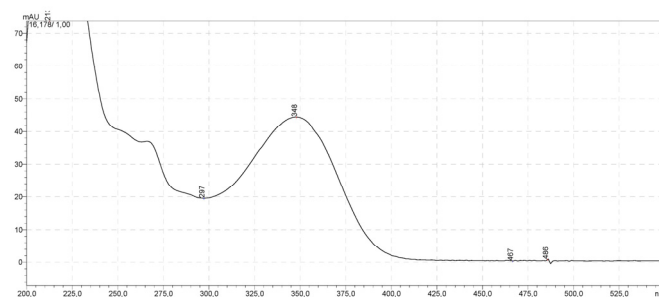

Chrysoeriol 7-O-glycosides

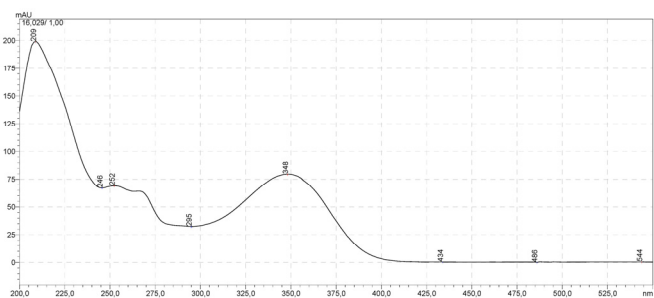

Luteolin 7-O-(2''-O-(6'''-O-acetyl)-glucosyl)-glucoside

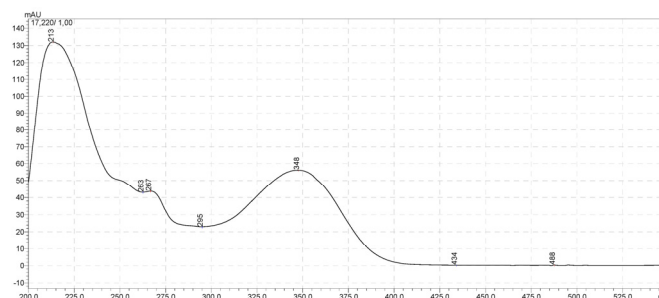

Chrysoeriol 7-O-(2''-O-(6'''-O-acetyl)-glucosyl)-glucoside

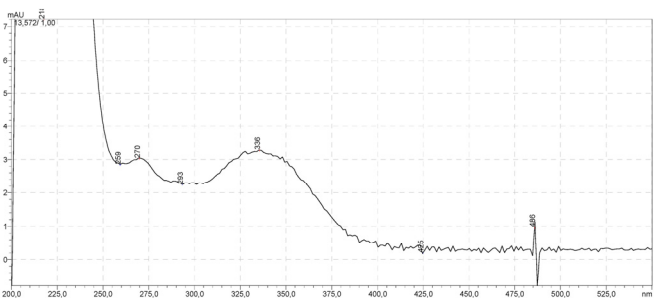

Schaftoside

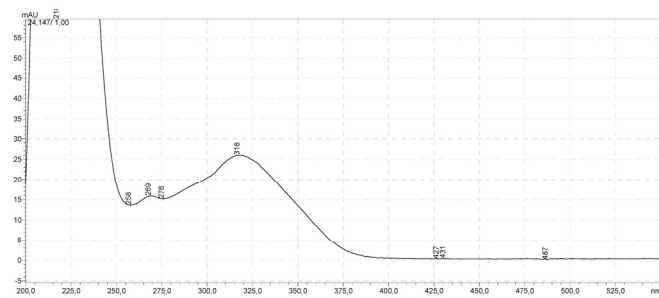

Echitin, echinacin

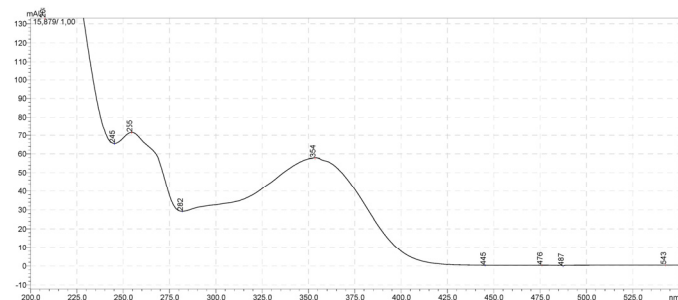

Quercetin/isorhamnetin 3-O-glycosides

**Figure S1.** Continuation.

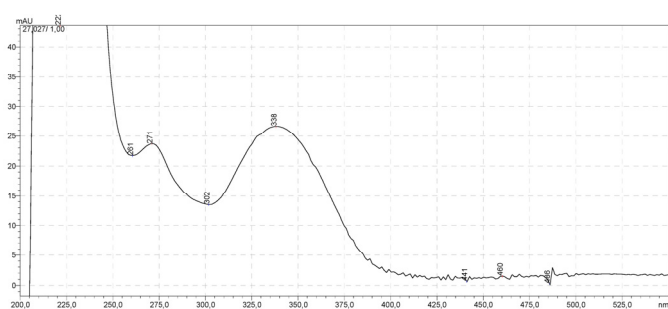

Cirsiliol

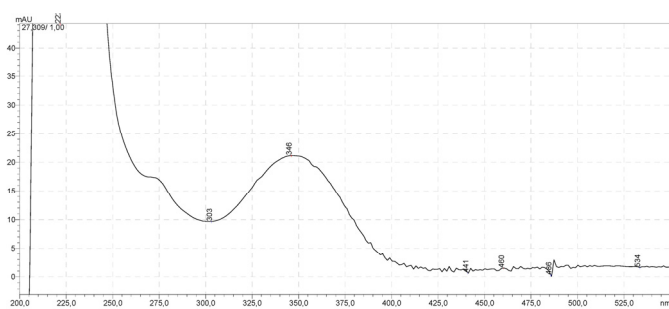

Chrysosplenetin

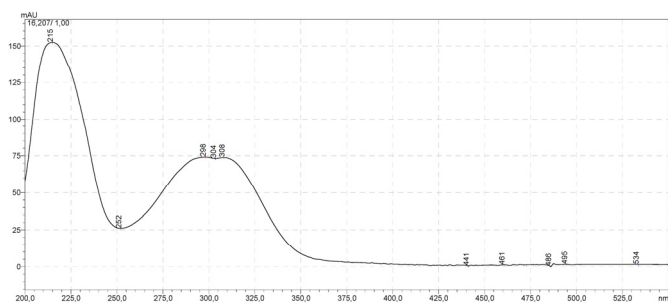Tri-*p*-coumaroyl spermines / spermidines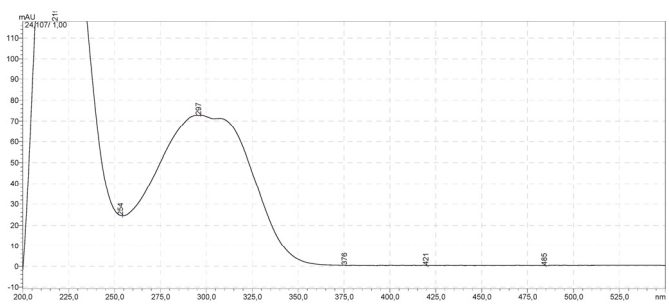Tetra-*p*-coumaroyl spermines**Figure S1.** Continuation.

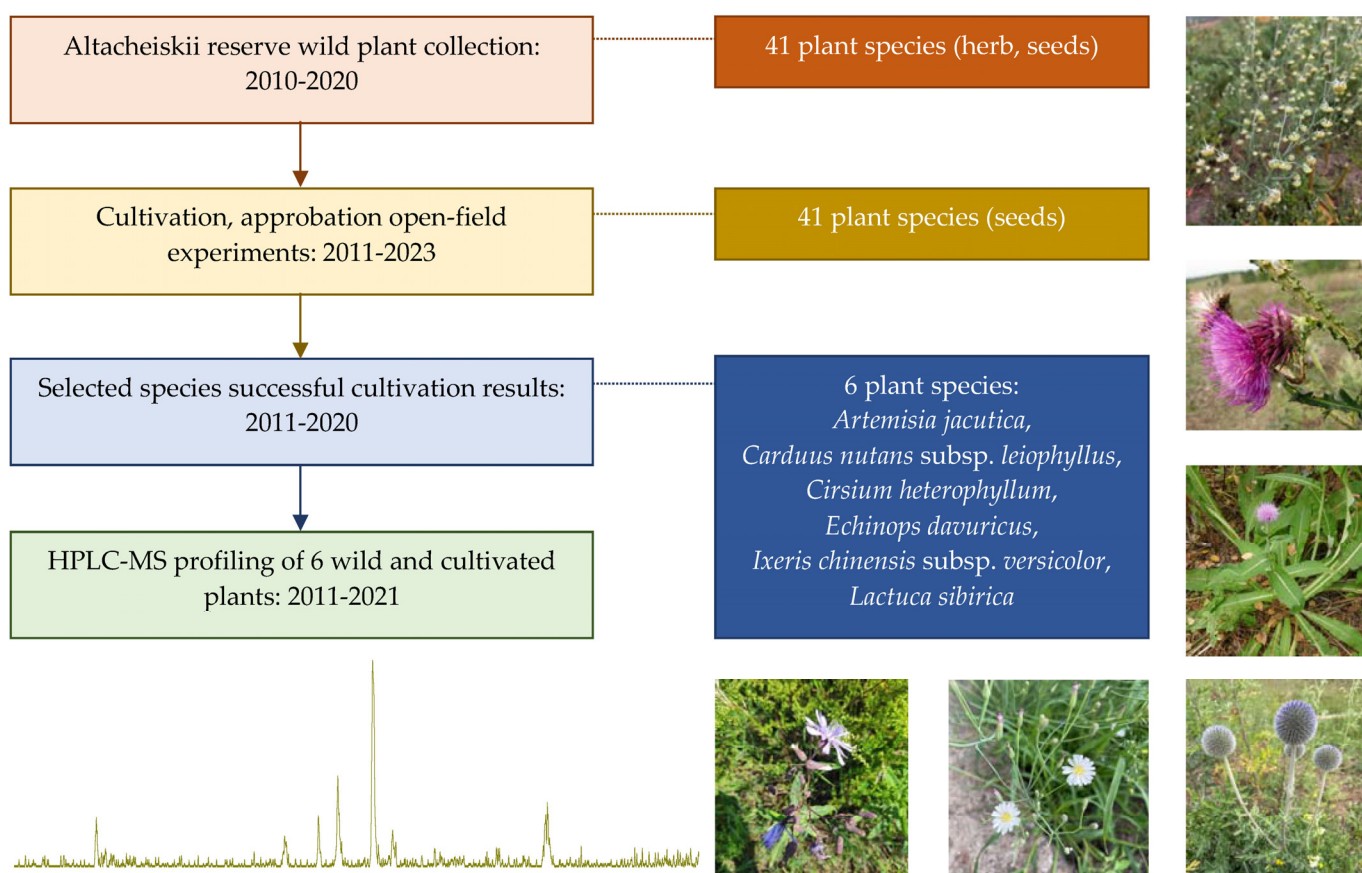

**Figure S2.** Flow chart for the experimental design.

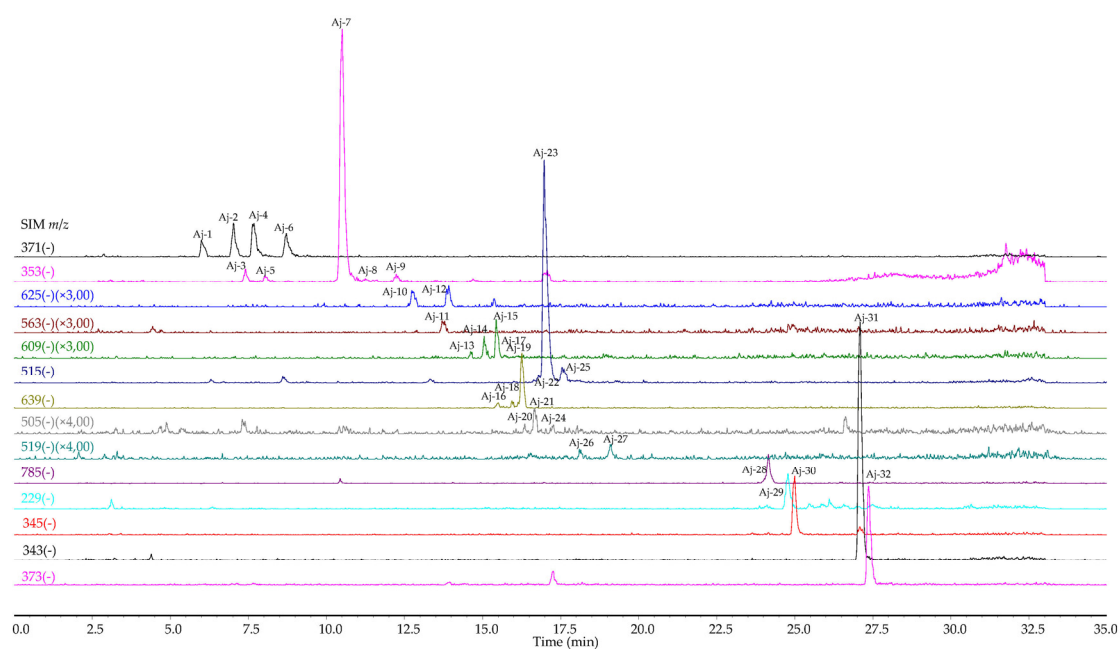

**Figure S3.** HPLC-MS chromatograms of *Artemisia jacutica* herb (wild sample AJW-1) in SIM mode (negative ionization; SIM  $m/z$  values in left panel). Compounds Aj-1–Aj-32 description see in Table S1.

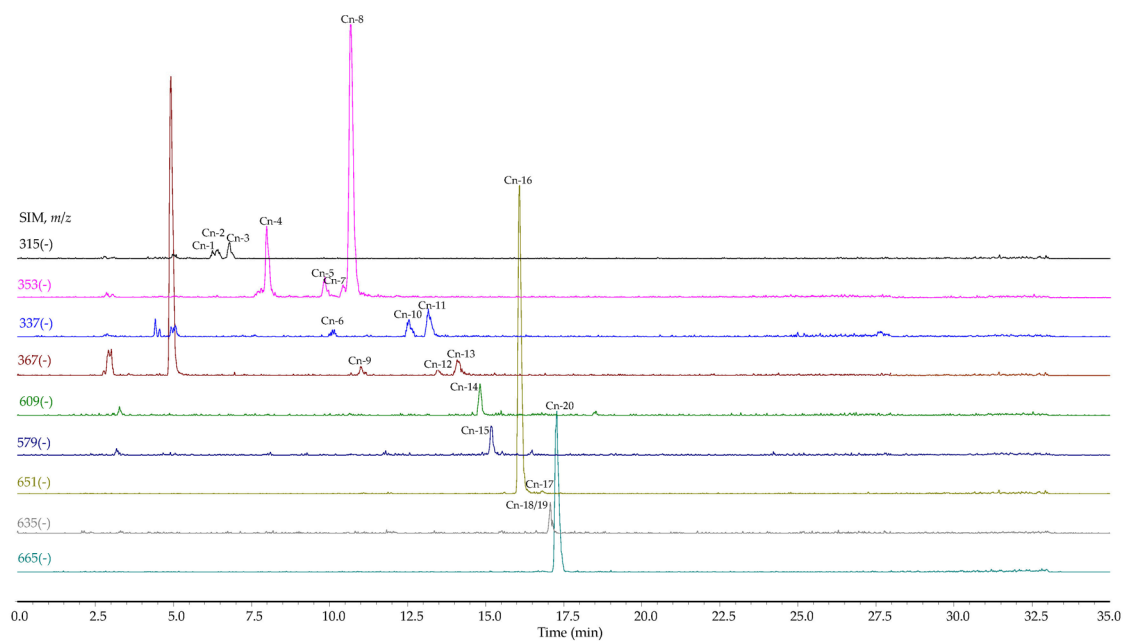

**Figure S4.** HPLC-MS chromatograms of *Carduus nutans* subsp. *leiophyllus* herb (wild sample CNW-1) in SIM mode (negative ionization; SIM  $m/z$  values in left panel). Compounds Cn-1–Cn-20 description see in Table S2.



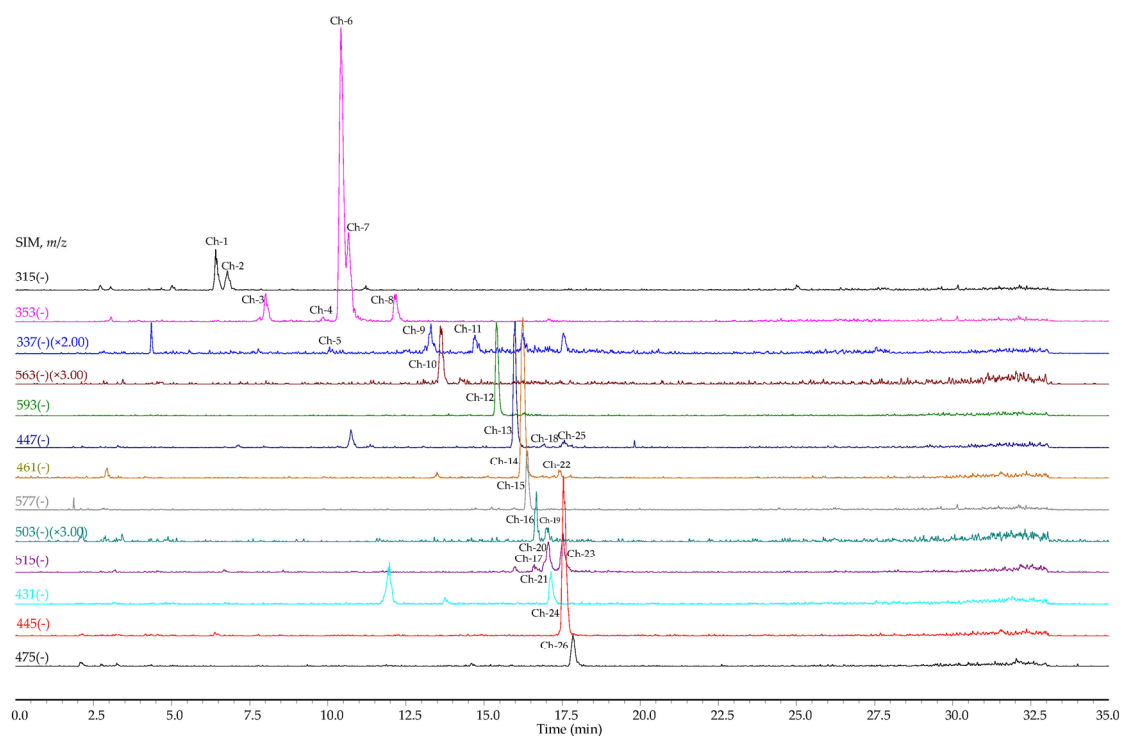

**Figure S5.** HPLC-MS chromatograms of *Cirsium heterophyllum* herb (wild sample CHW-1) in SIM mode (negative ionization; SIM  $m/z$  values in left panel). Compounds Ch-1–Ch-24 description see in Table S4.

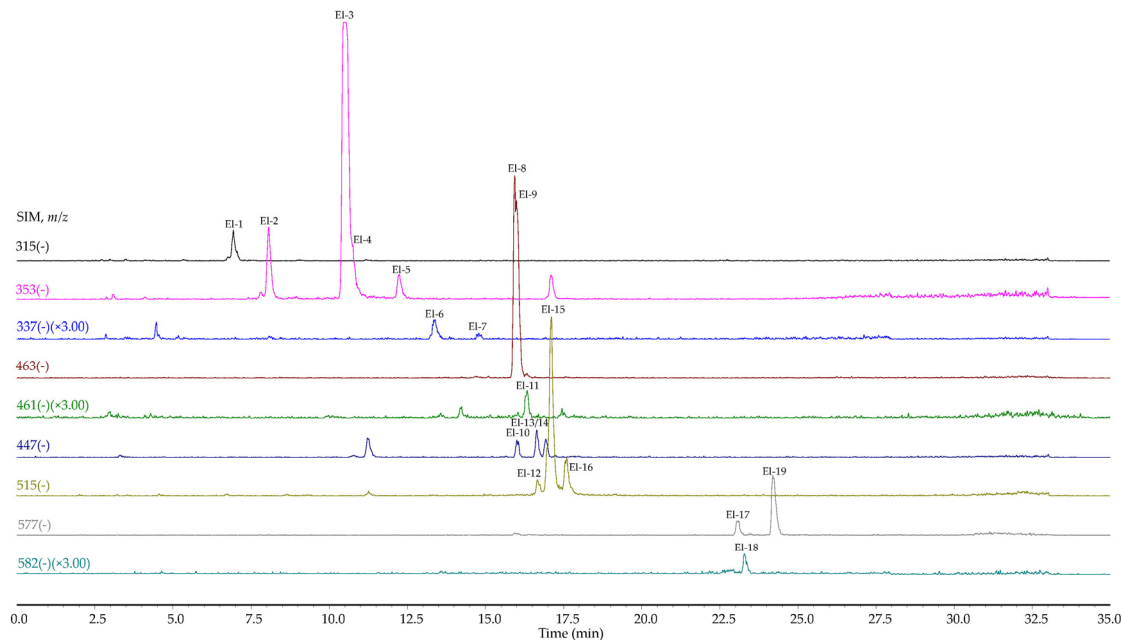

**Figure S6.** HPLC-MS chromatograms of *Echinops davuricus* herb (wild sample ELW-1) in SIM mode (negative ionization; SIM  $m/z$  values in left panel). Compounds EI-1–EI-19 description see in Table S5.

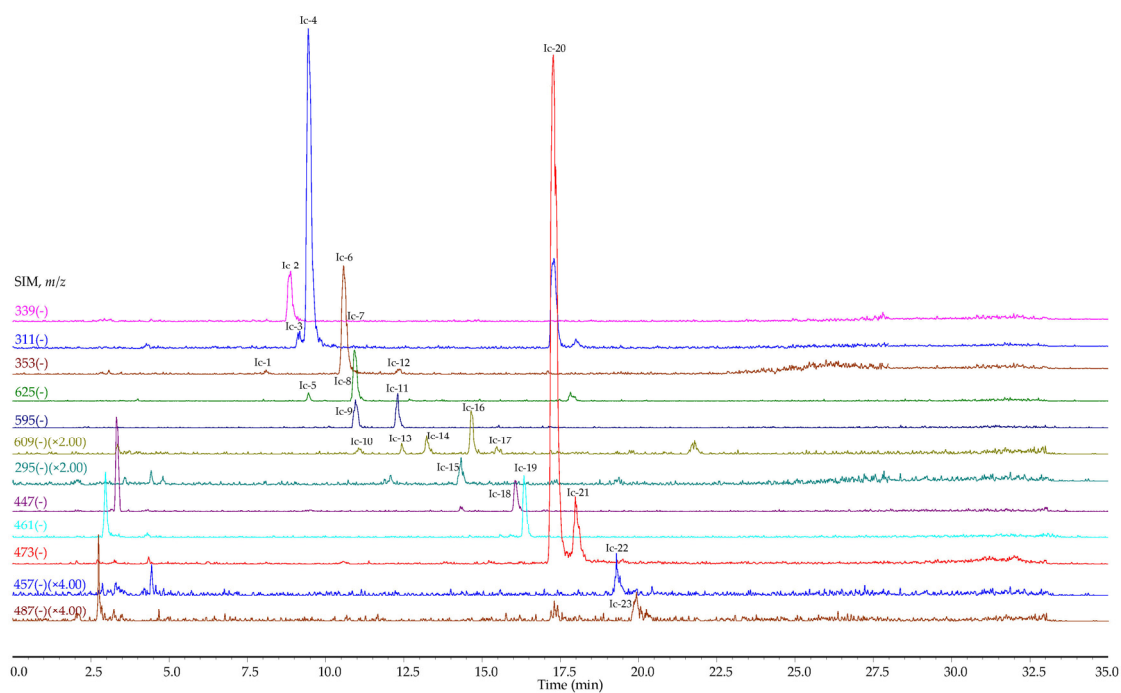

**Figure S7.** HPLC-MS chromatograms of *Ixeris chinensis* subsp. *versicolor* herb (wild sample ICW-1) in SIM mode (negative ionization; SIM  $m/z$  values in left panel). Compounds Ic-1–Ic-23 description see in Table S6.

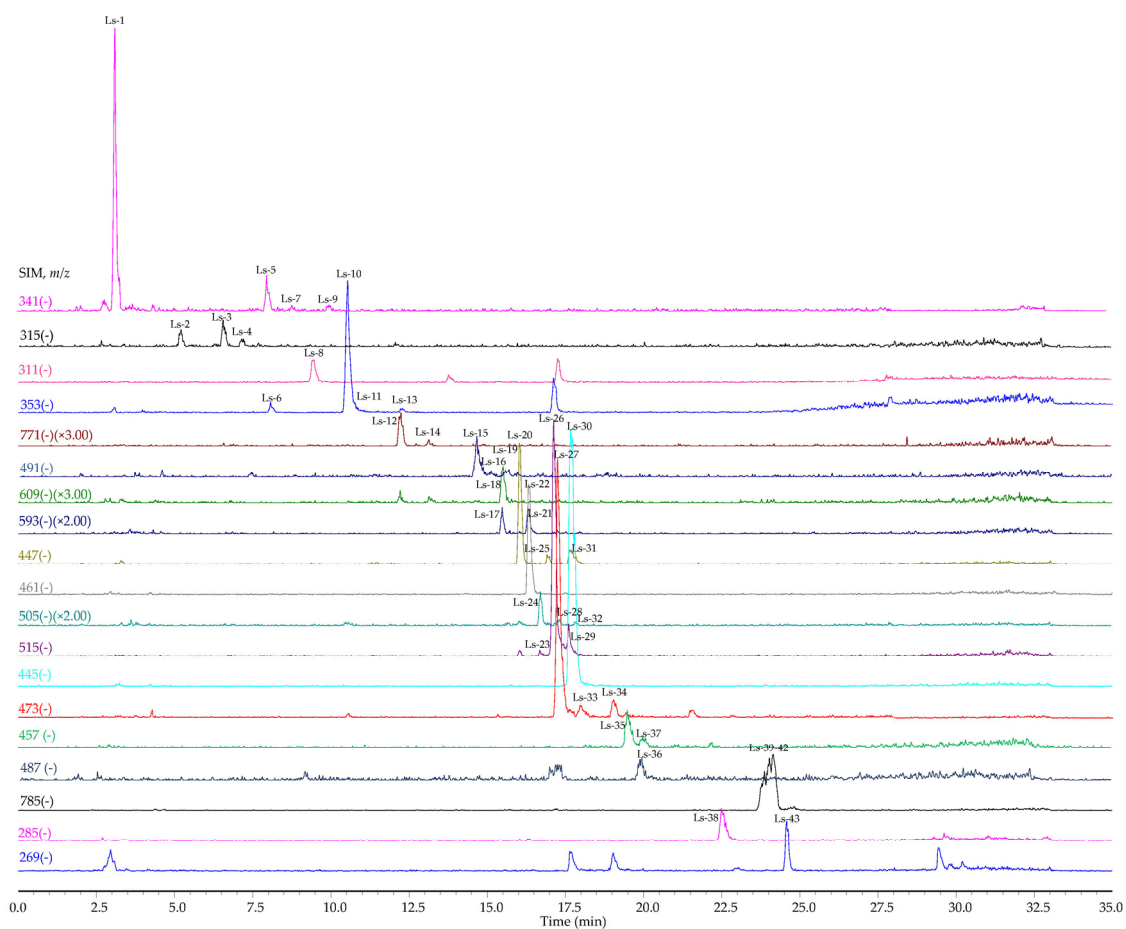

**Figure S8.** HPLC-MS chromatograms of *Lactuca sibirica* herb (wild sample LSW-1) in SIM mode (negative ionization; SIM  $m/z$  values in left panel). Compounds Ls-1–Ls-41 description see in Table S7.



**Table S1.** Description of wild samples of Asteraceae species collected in Altacheiskii reserve (<https://baikalzapovednik.ru/altacheisky#rec54745054>; accessed on 10 April 2024) for a period 2010–2020 and information on cultivation success.

| No    | Species                                                                                       | Seed and Herb Collection Year | Approbations Years | Cultivation Results*       |
|-------|-----------------------------------------------------------------------------------------------|-------------------------------|--------------------|----------------------------|
| AAW-1 | <i>Achillea asiatica</i> Serg.                                                                | 2010                          | 2011, 2012, 2013   | Ambiguously                |
| ADW-1 | <i>Antennaria dioica</i> (L.) Gaertn.                                                         | 2014                          | 2015, 2016         | Failed                     |
| AGW-1 | <i>Arctogeron gramineum</i> (L.) DC                                                           | 2012                          | 2013, 2014, 2015   | Ambiguously                |
| ANW-1 | <i>Artemisia anethifolia</i> Web. ex Stechm.                                                  | 2015                          | 2016, 2017, 2018   | Ambiguously                |
| AEW-1 | <i>Artemisia desertorum</i> Spreng.                                                           | 2010                          | 2011, 2012, 2013   | Ambiguously                |
| AFW-1 | <i>Artemisia frigida</i> Willd.                                                               | 2011                          | 2012, 2014         | Ambiguously                |
| AIW-1 | <i>Artemisia integrifolia</i> L.                                                              | 2017                          | 2018, 2019         | Ambiguously                |
| AJW-1 | <i>Artemisia jacutica</i> Drobow                                                              | 2016                          | 2017, 2019, 2021   | 2-year cultivation success |
| APW-1 | <i>Artemisia palustris</i> L.                                                                 | 2019                          | 2020, 2021, 2022   | Ambiguously                |
| AUW-1 | <i>Artemisia pubescens</i> var. <i>pubescens</i>                                              | 2020                          | 2021, 2022         | Ambiguously                |
| ASW-1 | <i>Artemisia sericea</i> Weber ex Stechm.                                                     | 2020                          | 2021, 2022         | Ambiguously                |
| ATW-1 | <i>Artemisia tanacetifolia</i> L.                                                             | 2010                          | 2011, 2012, 2013   | Ambiguously                |
| ALW-1 | <i>Aster alpinus</i> L.                                                                       | 2020                          | 2021, 2022         | Ambiguously                |
| ABW-1 | <i>Aster biennis</i> Ledeb.                                                                   | 2011                          | 2012, 2013         | Ambiguously                |
| ARW-1 | <i>Aster tataricus</i> L.                                                                     | 2010                          | 2011, 2012, 2013   | Ambiguously                |
| CHW-1 | <i>Cacalia hastata</i> L.                                                                     | 2018                          | 2019, 2020         | Ambiguously                |
| CNW-1 | <i>Carduus nutans</i> subsp. <i>leiophyllus</i> (Petrovič) Arènes                             | 2015                          | 2016, 2018, 2020   | 2-year cultivation success |
| CEW-1 | <i>Cirsium esculentum</i> (Siev.) C.A. Mey.                                                   | 2012                          | 2013, 2014, 2015   | Ambiguously                |
| CHW-1 | <i>Cirsium heterophyllum</i> (L.) Hill                                                        | 2014                          | 2015               | 6-year cultivation success |
| CSW-1 | <i>Cirsium serratuloides</i> (L.) Hill                                                        | 2019                          | 2020, 2022         | Ambiguously                |
| CBW-1 | <i>Crepis bungei</i> Ledeb.                                                                   | 2012                          | 2013, 2014, 2015   | Ambiguously                |
| CTW-1 | <i>Crepis tectorum</i> L.                                                                     | 2015                          | 2016, 2017         | Ambiguously                |
| EDW-1 | <i>Echinops davuricus</i> Fisch. ex Hornem.                                                   | 2010                          | 2011               | 9-year cultivation success |
| EAW-1 | <i>Erigeron acris</i> L.                                                                      | 2017                          | 2018, 2019         | Ambiguously                |
| FSW-1 | <i>Filifolium sibiricum</i> (L.) Kitam.                                                       | 2011                          | 2012, 2013         | Failed                     |
| GDW-1 | <i>Galatella davurica</i> DC.                                                                 | 2014                          | 2015, 2016, 2017   | Failed                     |
| ICW-1 | <i>Ixeris chinensis</i> subsp. <i>versicolor</i> (Fisch. ex Link) Kitam.                      | 2014                          | 2015               | 4-year cultivation success |
| LSW-1 | <i>Lactuca sibirica</i> (L.) Benth. ex Maxim.                                                 | 2014                          | 2015               | 5-year cultivation success |
| LAW-1 | <i>Leibnitzia anandria</i> (L.) Nakai                                                         | 2018                          | 2019, 2020         | Failed                     |
| NPW-1 | <i>Neopallasia pectinata</i> Poljak.                                                          | 2020                          | 2021, 2022, 2023   | Ambiguously                |
| PBW-1 | <i>Pentanema britannica</i> (L.) D.Gut.Larr., Santos-Vicente, Anderb., E.Rico & M.M.Mart.Ort. | 2014                          | 2015, 2016, 2017   | Ambiguously                |
| PDW-1 | <i>Picris davurica</i> Fisch.                                                                 | 2017                          | 2018, 2019, 2020   | Ambiguously                |
| SAW-1 | <i>Saussurea amara</i> (L.) DC.                                                               | 2020                          | 2021, 2022         | Ambiguously                |
| SSW-1 | <i>Saussurea salicifolia</i> (L.) DC.                                                         | 2010                          | 2011, 2012         | Ambiguously                |
| SUW-1 | <i>Scorzonera austriaca</i> Willd.                                                            | 2018                          | 2019, 2020         | Ambiguously                |
| SEW-1 | <i>Senecio erucifolius</i> L.                                                                 | 2017                          | 2018, 2019         | Ambiguously                |
| SDW-1 | <i>Solidago dahurica</i> (Kitag.) Kitag. ex Juz.                                              | 2015                          | 2016, 2017, 2019   | Ambiguously                |
| TLW-1 | <i>Taraxacum leucanthum</i> (Ledeb.) Ledeb.                                                   | 2014                          | 2015, 2016, 2017   | Failed                     |
| TIW-1 | <i>Tephroseris integrifolia</i> (L.) Holub                                                    | 2019                          | 2020, 2021, 2022   | Ambiguously                |
| TSW-1 | <i>Tephroseris subdentata</i> (Bunge) Holub                                                   | 2011                          | 2012, 2013, 2014   | Ambiguously                |
| YTW-1 | <i>Youngia tenuifolia</i> (Willd.) Bab. et Stebb.                                             | 2015                          | 2016, 2017, 2018   | Ambiguously                |

\* Ambiguously—mixed results, more research needed. Failed—failed to achieve successful cultivation.

**Table S2.** Plant cultivation conditions of six Asteraceae species.

| Species                                            | Experi-<br>mental Field<br>Size, m×m | Experi-<br>mental<br>Fields, n<br>(No.)                             | Distance Be-<br>tween<br>Plants, m | Soil Description                                                                                                                                                                                                                                                                                   | Climatic Data                                                                                                                                   |
|----------------------------------------------------|--------------------------------------|---------------------------------------------------------------------|------------------------------------|----------------------------------------------------------------------------------------------------------------------------------------------------------------------------------------------------------------------------------------------------------------------------------------------------|-------------------------------------------------------------------------------------------------------------------------------------------------|
| <i>Artemisia jacutica</i>                          | 50 × 60                              | 3<br>(24-1b-1, 24-<br>1b-2,<br>24-1b-3)                             | 0.6                                | Soil type: Dark humus.<br>Fertile Layer: 70–90 cm.<br>Soil P <sub>2</sub> O <sub>5</sub> content: 22–24<br>mg/100 g. Soil K <sub>2</sub> O content:<br>60–64 mg/100 g. pH: 7.4.<br>Humus content: 8–9%. To-<br>tal N: 0.5–0.6%. C : N Ratio:<br>10–11. No organic/inor-<br>ganic fertilizers used. | Average annual<br>precipitation:<br>230–250 mm.<br>Frost-free pe-<br>riod: 110–116<br>days. Sum of<br>temperatures<br>above 10°C:<br>1900–2000. |
| <i>Carduus nutans</i> subsp.<br><i>leiophyllus</i> | 70 × 70                              | 4<br>(24-1b-7, 24-<br>1b-8,<br>24-1b-9,<br>24-1b-10)                | 1.2                                |                                                                                                                                                                                                                                                                                                    |                                                                                                                                                 |
| <i>Cirsium heterophyllum</i>                       | 50 × 40                              | 3<br>(24-1b-15,<br>24-1b-16,<br>24-1b-17)                           | 0.6                                |                                                                                                                                                                                                                                                                                                    |                                                                                                                                                 |
| <i>Echinops davuricus</i>                          | 70 × 90                              | 3<br>(24-1b-27,<br>24-1b-28,<br>24-1b-29)                           | 0.5                                |                                                                                                                                                                                                                                                                                                    |                                                                                                                                                 |
| <i>Ixeris chinensis</i> subsp. <i>versicolor</i>   | 40 × 40                              | 4<br>(24-1b-35,<br>24-1b-36,<br>24-1b-37,<br>24-1b-38)              | 0.3                                |                                                                                                                                                                                                                                                                                                    |                                                                                                                                                 |
| <i>Lactuca sibirica</i>                            | 40 × 50                              | 5<br>(24-1b-52,<br>24-1b-53,<br>24-1b-54,<br>24-1b-55,<br>24-1b-56) | 0.4                                |                                                                                                                                                                                                                                                                                                    |                                                                                                                                                 |

**Table S3.** Plant sample description for HPLC assay.

| Species                                          | Experimental Field No | Year of Collection (plant age, years; sample numbers = repetition, one dry sample weight, kg) |
|--------------------------------------------------|-----------------------|-----------------------------------------------------------------------------------------------|
| <i>Artemisia jacutica</i>                        | 24-1b-1               | 2021 (1; 5/0.1), 2022 (2; 5/0.5)                                                              |
|                                                  | 24-1b-2               | 2021 (1; 5/0.1), 2022 (2; 5/0.7)                                                              |
|                                                  | 24-1b-3               | 2021 (1; 5/0.1), 2022 (2; 5/0.6)                                                              |
| <i>Carduus nutans</i> subsp. <i>leiophyllus</i>  | 24-1b-7               | 2020 (1; 5/0.8), 2021 (2; 5/2.5)                                                              |
|                                                  | 24-1b-8               | 2020 (1; 5/0.7), 2021 (2; 5/2.0)                                                              |
|                                                  | 24-1b-9               | 2020 (1; 5/0.7), 2021 (2; 5/3.5)                                                              |
|                                                  | 24-1b-10              | 2020 (1; 5/0.9), 2021 (2; 5/1.5)                                                              |
| <i>Cirsium heterophyllum</i>                     | 24-1b-15              | 2015 (1; 5/0.2), 2016 (2; 5/0.7), 2018 (4; 5/1.4), 2020 (6; 5/2.9)                            |
|                                                  | 24-1b-16              | 2015 (1; 5/0.1), 2016 (2; 5/0.6), 2018 (4; 5/1.2), 2020 (6; 5/2.4)                            |
|                                                  | 24-1b-17              | 2015 (1; 5/0.2), 2016 (2; 5/0.5), 2018 (4; 5/1.2), 2020 (6; 5/2.5)                            |
| <i>Echinops davuricus</i>                        | 24-1b-27              | 2011 (1; 4/0.3), 2013 (3; 4/0.9), 2015 (5; 4/1.6), 2017 (7; 4/1.7), 2019 (9; 4/1.5)           |
|                                                  | 24-1b-28              | 2011 (1; 4/0.2), 2013 (3; 4/0.8), 2015 (5; 4/1.2), 2017 (7; 4/1.4), 2019 (9; 4/1.5)           |
|                                                  | 24-1b-29              | 2011 (1; 4/0.4), 2013 (3; 4/0.8), 2015 (5; 4/1.4), 2017 (7; 4/1.4), 2019 (9; 4/1.5)           |
| <i>Ixeris chinensis</i> subsp. <i>versicolor</i> | 24-1b-35              | 2015 (1; 6/0.1), 2016 (2; 6/0.2), 2017 (3; 6/0.3), 2018 (4; 6/0.3)                            |
|                                                  | 24-1b-36              | 2015 (1; 6/0.08), 2016 (2; 6/0.2), 2017 (3; 6/0.3), 2018 (4; 6/0.3)                           |
|                                                  | 24-1b-37              | 2015 (1; 6/0.1), 2016 (2; 6/0.2), 2017 (3; 6/0.3), 2018 (4; 6/0.3)                            |
|                                                  | 24-1b-38              | 2015 (1; 6/0.1), 2016 (2; 6/0.2), 2017 (3; 6/0.3), 2018 (4; 6/0.3)                            |
| <i>Lactuca sibirica</i>                          | 24-1b-52              | 2015 (1; 5/0.1), 2016 (2; 5/0.2), 2017 (3; 5/0.4), 2019 (5; 5/0.3)                            |
|                                                  | 24-1b-53              | 2015 (1; 5/0.1), 2016 (2; 5/0.15), 2017 (3; 5/0.3), 2019 (5; 5/0.3)                           |
|                                                  | 24-1b-54              | 2015 (1; 5/0.1), 2016 (2; 5/0.2), 2017 (3; 5/0.3), 2019 (5; 5/0.3)                            |
|                                                  | 24-1b-55              | 2015 (1; 5/0.1), 2016 (2; 5/0.17), 2017 (3; 5/0.4), 2019 (5; 5/0.3)                           |
|                                                  | 24-1b-56              | 2015 (1; 5/0.1), 2016 (2; 5/0.2), 2017 (3; 5/0.4), 2019 (5; 5/0.3)                            |

**Table S4.** Reference standards used for HPLC profiling and quantification.

| Analyzed Compound                                                                                                                                        | Reference Compound.<br>HPLC-Profiling                                                            | Reference Compound. Quantification                                                                                                                             |
|----------------------------------------------------------------------------------------------------------------------------------------------------------|--------------------------------------------------------------------------------------------------|----------------------------------------------------------------------------------------------------------------------------------------------------------------|
| Benzoates                                                                                                                                                |                                                                                                  |                                                                                                                                                                |
| Protocatechuic acid <i>O</i> -hexosides                                                                                                                  | Protocatechuic acid 4- <i>O</i> -β-glucoside.<br>ChemFaces. Cat. No.: CFN95557. Pu-<br>rity ≥98% | Protocatechuic acid 4- <i>O</i> -β-glucoside.<br>ChemFaces. Cat. No.: CFN95557. Pu-<br>rity ≥98%                                                               |
| Protocatechuic acid 4- <i>O</i> -glucoside                                                                                                               |                                                                                                  |                                                                                                                                                                |
| Vanilloyl quinic acid (probably 1- <i>O</i> -isomer)                                                                                                     | Putative identification. Ref. [40–42]                                                            | Vanillic acid 4-β-D-glucoside. Med-<br>ChemExpress. Cat. No.: HY-114760.<br>Purity ≥98%. Conversion factor (differ-<br>ence in MW): 0.97.                      |
| Vanilloyl quinic acid (probably 4- <i>O</i> -isomer)                                                                                                     |                                                                                                  |                                                                                                                                                                |
| Vanilloyl quinic acid (probably 5- <i>O</i> -isomer)                                                                                                     |                                                                                                  |                                                                                                                                                                |
| Divanilloyl quinic acid (probably 3,4- <i>O</i> -isomer)                                                                                                 |                                                                                                  | Vanillic acid 4-β-D-glucoside. Med-<br>ChemExpress. Cat. No.: HY-114760.<br>Purity ≥98%. Conversion factor (differ-<br>ence in MW): 0.67.                      |
| Divanilloyl quinic acid (probably 3,5- <i>O</i> -isomer)                                                                                                 |                                                                                                  |                                                                                                                                                                |
| Divanilloyl quinic acid (probably 4,5- <i>O</i> -isomer)                                                                                                 |                                                                                                  |                                                                                                                                                                |
| Coumarins                                                                                                                                                |                                                                                                  |                                                                                                                                                                |
| Esculetin 7- <i>O</i> -glucoside                                                                                                                         | Cichoriin. ChemFaces. Cat. No.:<br>CFN95196. Purity ≥98%                                         | Cichoriin. ChemFaces. Cat. No.:<br>CFN95196. Purity ≥98%                                                                                                       |
| Hydroxycinnamates                                                                                                                                        |                                                                                                  |                                                                                                                                                                |
| 3- <i>O</i> -Caffeoyl glucaric acid<br>4- <i>O</i> -Caffeoyl glucaric acid<br>2- <i>O</i> -Caffeoyl glucaric acid<br>5- <i>O</i> -Caffeoyl glucaric acid | Laboratory collection. Ref. [43]                                                                 | <i>trans</i> -Caffeoyl-6- <i>O</i> -D-gluconic acid.<br>MedChemExpress. Cat. No.: HY-<br>N11466. Purity ≥98%. Conversion fac-<br>tor (difference in MW): 0.96. |
| Caftaric acid isomer<br>Caftaric acid                                                                                                                    | Caftaric acid. ChemFaces. Cat. No.:<br>CFN00384. Purity ≥98%                                     | Caftaric acid. ChemFaces. Cat. No.:<br>CFN00384. Purity ≥98%                                                                                                   |
| Cichoric acid ( <i>di-trans</i> isomer)<br>Cichoric acid ( <i>cis-trans</i> isomer)<br>Cichoric acid ( <i>cis-cis</i> isomer)                            | Cichoric acid. ChemFaces. Cat. No.:<br>CFN99725. Purity ≥98%                                     | Cichoric acid. ChemFaces. Cat. No.:<br>CFN99725. Purity ≥98%                                                                                                   |
| Coutaric acid                                                                                                                                            | Coutaric acid. SLS Scientific Labora-<br>tory Supplies. Cat. No.: SIGPHL83843.<br>Purity ≥96%    | Coutaric acid. SLS Scientific Labora-<br>tory Supplies. Cat. No.: SIGPHL83843.<br>Purity ≥96%                                                                  |
| <i>p</i> -Coumaroyl-caffeoyl-tartaric acids                                                                                                              | Putative identification. Ref. [44,45]                                                            | Cichoric acid. ChemFaces. Cat. No.:<br>CFN99725. Purity ≥98%. Conversion<br>factor (difference in MW): 1.04.                                                   |
| Feruloyl-caffeoyl-tartaric acid                                                                                                                          |                                                                                                  | Cichoric acid. ChemFaces. Cat. No.:<br>CFN99725. Purity ≥98%. Conversion<br>factor (difference in MW): 0.81.                                                   |
| 3- <i>O-p</i> -Coumaroyl quinic acid                                                                                                                     | 3- <i>O-p</i> -Coumaroylquinic acid. Sigma-<br>Aldrich. Cat. No.: 935557. Purity ≥95%            | 3- <i>O-p</i> -Coumaroylquinic acid. Sigma-<br>Aldrich. Cat. No.: 935557. Purity ≥95%                                                                          |
| 4- <i>O-p</i> -Coumaroyl quinic acid                                                                                                                     | 4- <i>O</i> -Coumaroylquinic acid. Chem-<br>Faces. Cat. No.: CFN95508. Purity<br>≥98%            | 4- <i>O</i> -Coumaroylquinic acid. Chem-<br>Faces. Cat. No.: CFN95508. Purity<br>≥98%                                                                          |
| 5- <i>O-p</i> -Coumaroyl quinic acid                                                                                                                     | 5- <i>O</i> -Coumaroylquinic acid. Chem-<br>Faces. Cat. No.: CFN95507. Purity<br>≥98%            | 5- <i>O</i> -Coumaroylquinic acid. Chem-<br>Faces. Cat. No.: CFN95507. Purity<br>≥98%                                                                          |
| 3- <i>O</i> -Caffeoyl quinic acid ( <i>trans</i> -)                                                                                                      | Chlorogenic acid. MedChemExpress.<br>Cat. No.: HY-N0055. Purity ≥99.35%.                         | Chlorogenic acid. MedChemExpress.<br>Cat. No.: HY-N0055. Purity ≥99.35%.                                                                                       |
| 4- <i>O</i> -Caffeoyl quinic acid ( <i>trans</i> -)                                                                                                      | Cryptochlorogenic acid. Med-<br>ChemExpress. Cat. No.: HY-N0787.<br>Purity ≥99.88%.              | Cryptochlorogenic acid. Med-<br>ChemExpress. Cat. No.: HY-N0787.<br>Purity ≥99.88%.                                                                            |
| 4- <i>O</i> -Caffeoyl quinic acid ( <i>cis</i> -)                                                                                                        |                                                                                                  |                                                                                                                                                                |
| 5- <i>O</i> -Caffeoyl quinic acid ( <i>trans</i> -)                                                                                                      | Neochlorogenic acid. Med-<br>ChemExpress. Cat. No.: HY-N0722.<br>Purity ≥99.07%.                 | Neochlorogenic acid. Med-<br>ChemExpress. Cat. No.: HY- N0722.<br>Purity ≥99.07%.                                                                              |
| 5- <i>O</i> -Caffeoyl quinic acid ( <i>cis</i> -)                                                                                                        | <i>Cis</i> -5-Caffeoylquinic acid. BenchChem.<br>Cat. No.: B1222021. Purity ≥98%.                | <i>Cis</i> -5-Caffeoylquinic acid. BenchChem.<br>Cat. No.: B1222021. Purity ≥98%.                                                                              |
| 3,4-Di- <i>O</i> -caffeoyl quinic acid                                                                                                                   | 3,4-Dicaffeoylquinic acid. Med-<br>ChemExpress. Cat. No.: HY-N0057.<br>Purity ≥98.64%.           | 3,4-Dicaffeoylquinic acid. Med-<br>ChemExpress. Cat. No.: HY-N0057.<br>Purity ≥98.64%.                                                                         |
| 3,5-Di- <i>O</i> -caffeoyl quinic acid                                                                                                                   | 3,5-Di- <i>O</i> -caffeoylquinic acid. Chem-<br>Faces. Cat. No.: CFN93712. Purity<br>≥98%        | 3,5-Di- <i>O</i> -caffeoylquinic acid. Chem-<br>Faces. Cat. No.: CFN93712. Purity<br>≥98%                                                                      |

|                                                         |                                                                                   |                                                                                                                                                       |
|---------------------------------------------------------|-----------------------------------------------------------------------------------|-------------------------------------------------------------------------------------------------------------------------------------------------------|
| 4,5-Di-O-caffeoyl quinic acid                           | 4,5-Di-O-caffeoyl quinic acid. Med-ChemExpress. Cat. No.: HY-N11077. Purity ≥98%. | 4,5-Di-O-caffeoyl quinic acid. Med-ChemExpress. Cat. No.: HY-N11077. Purity ≥98%.                                                                     |
| 3-O-Feruloyl quinic acid                                | 3-O-Feruloyl quinic acid. ChemFaces. Cat. No.: CFN92393. Purity ≥98%.             | 3-O-Feruloyl quinic acid. ChemFaces. Cat. No.: CFN92393. Purity ≥98%.                                                                                 |
| 4-O-Feruloyl quinic acid                                | 4-O-Feruloyl quinic acid. ChemFaces. Cat. No.: CFN92392. Purity ≥98%.             | 4-O-Feruloyl quinic acid. ChemFaces. Cat. No.: CFN92392. Purity ≥98%.                                                                                 |
| 5-O-Feruloyl quinic acid                                | 5-O-Feruloyl quinic acid. ChemFaces. Cat. No.: CFN92889. Purity ≥98%.             | 5-O-Feruloyl quinic acid. ChemFaces. Cat. No.: CFN92889. Purity ≥98%.                                                                                 |
| <i>Flavonoids</i>                                       |                                                                                   |                                                                                                                                                       |
| Apigenin 7-O-glucoside                                  | Apigenin 7-O-glucoside. Extrasynthese. Cat. No.: 1004 S. Purity ≥99%.             | Apigenin 7-O-glucoside. Extrasynthese. Cat. No.: 1004 S. Purity ≥99%.                                                                                 |
| Apigenin 7-O-glucuronide                                | Apigenin 7-O-glucuronide. Med-ChemExpress. Cat. No.: HY-N1454. Purity ≥98.83%.    | Apigenin 7-O-glucuronide. Med-ChemExpress. Cat. No.: HY-N1454. Purity ≥98.83%.                                                                        |
| Apigenin 7-O-rutinoside                                 | Isorhoifolin. Cayman Chemical. Cat. No.: 34036. Purity ≥95%                       | Isorhoifolin. Cayman Chemical. Cat. No.: 34036. Purity ≥95%                                                                                           |
| Apigenin 7-O-(2''-O- <i>p</i> -coumaroyl)-glucoside     | Laboratory collection. Ref. [46]                                                  | Apigenin 4'-O-(2'',6''-di-O- <i>E-p</i> -coumaroyl)glucoside. ChemFaces. Cat. No.: CFN95276. Purity ≥98%. Conversion factor (difference in MW): 1.25. |
| Apigenin 7-O-(6''-O- <i>p</i> -coumaroyl)-glucoside     |                                                                                   |                                                                                                                                                       |
| Apigenin di-O-hexoside-O-acetates                       | Putative identification. Ref. [47]                                                | Apigenin 7-O-glucoside. Extrasynthese. Cat. No.: 1004 S. Purity ≥99%. Conversion factor (difference in MW): 0.68.                                     |
| Apigenin 6-C-glucoside-8-C-arabinoside                  | Schaftoside. ChemFaces. Cat. No.: CFN90197. Purity ≥98%.                          | Schaftoside. ChemFaces. Cat. No.: CFN90197. Purity ≥98%.                                                                                              |
| Acacetin 7-O-glucoside                                  | Tilianin. ChemFaces. Cat. No.: CFN92764. Purity ≥98%.                             | Tilianin. ChemFaces. Cat. No.: CFN92764. Purity ≥98%.                                                                                                 |
| Luteolin 5-O-glucoside                                  | Luteolin 5-O-glucoside. Med-ChemExpress. Cat. No.: HY-N2008. Purity ≥97.18%.      | Luteolin 5-O-glucoside. Med-ChemExpress. Cat. No.: HY-N2008. Purity ≥97.18%.                                                                          |
| Luteolin 7-O-glucoside                                  | Luteolin 7-glucoside. Sigma-Aldrich. Cat. No.: 49968. Purity ≥98%.                | Luteolin 7-glucoside. Sigma-Aldrich. Cat. No.: 49968. Purity ≥98%                                                                                     |
| Luteolin 3'-O-glucoside                                 | Luteolin 3'-glucoside. Phytolab GmbH & Co. KG. Cat. No.: 85840. Purity ≥98%.      | Luteolin 3'-glucoside. Phytolab GmbH & Co. KG. Cat. No.: 85840. Purity ≥98%.                                                                          |
| Luteolin 4'-O-glucoside                                 | Luteolin 4'-O-glucoside. Extrasynthese. Cat. No.: 1412 S. Purity ≥98%.            | Luteolin 4'-O-glucoside. Extrasynthese. Cat. No.: 1412 S. Purity ≥98%.                                                                                |
| Luteolin 7-O-rutinoside                                 | Luteolin 7-rutinoside. Med-ChemExpress. Cat. No.: HY-N6647. Purity ≥98.47%.       | Luteolin 7-rutinoside. Med-ChemExpress. Cat. No.: HY-N6647. Purity ≥98.47%.                                                                           |
| Luteolin 7-O-(2''-O-glucosyl)-glucoside                 | Laboratory collection. Ref. [48]                                                  | Luteolin 7-glucoside. Sigma-Aldrich. Cat. No.: 49968. Purity ≥98%. Conversion factor (difference in MW): 0.73.                                        |
| Luteolin 7-O-(2''-O-(6'''-O-acetyl)-glucosyl)-glucoside | Isolated in present work.                                                         | Luteolin 7-glucoside. Sigma-Aldrich. Cat. No.: 49968. Purity ≥98%. Conversion factor (difference in MW): 0.69.                                        |
| Luteolin O-hexoside-O-pentoside                         | Putative identification. Ref. [49]                                                | Luteolin 7-glucoside. Sigma-Aldrich. Cat. No.: 49968. Purity ≥98%. Conversion factor (difference in MW): 0.77.                                        |
| Luteolin di-O-hexoside-O-acetate                        | Putative identification. Ref. [49]                                                | Luteolin 7-glucoside. Sigma-Aldrich. Cat. No.: 49968. Purity ≥98%. Conversion factor (difference in MW): 0.67.                                        |
| Luteolin tri-O-hexosides                                | Putative identification. Ref. [49]                                                | Luteolin 7-glucoside. Sigma-Aldrich. Cat. No.: 49968. Purity ≥98%. Conversion factor (difference in MW): 0.58.                                        |
| Chrysoeriol 7-O-glucoside                               | Chrysoeriol 7-O-glucoside. ChemFaces. Cat. No.: CFN93021. Purity ≥98%.            | Chrysoeriol 7-O-glucoside. ChemFaces. Cat. No.: CFN93021. Purity ≥98%.                                                                                |
| Chrysoeriol 4'-O-glucoside                              | Laboratory collection. Ref. [50]                                                  | Chrysoeriol 7-O-glucoside. ChemFaces. Cat. No.: CFN93021. Purity ≥98%.                                                                                |

|                                                                                       |                                                                                                |                                                                                                                                      |
|---------------------------------------------------------------------------------------|------------------------------------------------------------------------------------------------|--------------------------------------------------------------------------------------------------------------------------------------|
| Chrysoeriol 7- <i>O</i> -(2''- <i>O</i> -acetyl)-glucoside                            | Laboratory collection. Ref. [50]                                                               | Chrysoeriol 7- <i>O</i> -glucoside. ChemFaces. Cat. No.: CFN93021. Purity ≥98%. Conversion factor (difference in MW): 0.92.          |
| Chrysoeriol 7- <i>O</i> -(6''- <i>O</i> -acetyl)-glucoside                            |                                                                                                |                                                                                                                                      |
| Chrysoeriol 7- <i>O</i> -(2''- <i>O</i> -(6'''- <i>O</i> -acetyl)-glucosyl)-glucoside | Isolated in present work.                                                                      | Chrysoeriol 7- <i>O</i> -glucoside. ChemFaces. Cat. No.: CFN93021. Purity ≥98%. Conversion factor (difference in MW): 0.69.          |
| 6-Hydroxyluteolin di- <i>O</i> -hexoside                                              | Putative identification. Ref. [51]                                                             | 6-Hydroxyluteolin 7- <i>O</i> -glucoside. ChemFaces. Cat. No.: CFN91094. Purity ≥98%. Conversion factor (difference in MW): 0.74.    |
| Pectolarigenin 7- <i>O</i> -glucoside                                                 | Pectolarigenin 7- <i>O</i> -glucoside. Geopharma Co. Cat. No.: 35-5373-11-5. Purity ≥98%.      | Pectolarigenin 7- <i>O</i> -glucoside. Geopharma Co. Cat. No.: 35-5373-11-5. Purity ≥98%.                                            |
| Kaempferol 3- <i>O</i> -neohesperidoside                                              | Kaempferol 3- <i>O</i> -neohesperidoside. MedChemExpress. Cat. No.: HY-107207. Purity ≥99.86%. | Kaempferol 3- <i>O</i> -neohesperidoside. MedChemExpress. Cat. No.: HY-107207. Purity ≥99.86%.                                       |
| Kaempferol 3- <i>O</i> -rutinoside                                                    | Nicotiflorin. Selleck Chemicals. Cat. No.: S3267. Purity ≥99.91%.                              | Nicotiflorin. Selleck Chemicals. Cat. No.: S3267. Purity ≥99.91%.                                                                    |
| Kempferol 3- <i>O</i> -sophoroside                                                    | Kempferol 3- <i>O</i> -sophoroside. MedChemExpress. Cat. No.: HY-N2055. Purity ≥99.84%.        | Kempferol 3- <i>O</i> -sophoroside. MedChemExpress. Cat. No.: HY-N2055. Purity ≥99.84%.                                              |
| Kaempferol 3- <i>O</i> -gentiobioside                                                 | Kaempferol 3- <i>O</i> -gentiobioside. ChemFaces. Cat. No.: CFN92384. Purity ≥98%.             | Kaempferol 3- <i>O</i> -gentiobioside. ChemFaces. Cat. No.: CFN92384. Purity ≥98%.                                                   |
| Kaempferol 7- <i>O</i> -glucoside                                                     | Kaempferol 7- <i>O</i> -glucoside. Cayman Chemical. Cat. No.: CAY34347. Purity ≥98%.           | Kaempferol 7- <i>O</i> -glucoside. Cayman Chemical. Cat. No.: CAY34347. Purity ≥98%.                                                 |
| Kaempferol di- <i>O</i> -hexoside                                                     | Putative identification. Ref. [52]                                                             | Kempferol 3- <i>O</i> -sophoroside. MedChemExpress. Cat. No.: HY-N2055. Purity ≥99.84%.                                              |
| Quercetin 3- <i>O</i> -glucoside                                                      | Isoquercitrin. Sigma-Aldrich. Cat. No.: 00140585. Purity ≥95%.                                 | Isoquercitrin. Sigma-Aldrich. Cat. No.: 00140585. Purity ≥95%.                                                                       |
| Quercetin 3- <i>O</i> -galactoside                                                    | Quercetin 3- <i>O</i> -galactoside. Cayman Chemical. Cat. No.: 18648. Purity ≥98%.             | Quercetin 3- <i>O</i> -galactoside. Cayman Chemical. Cat. No.: 18648. Purity ≥98%.                                                   |
| Quercetin 3- <i>O</i> -(2''- <i>O</i> -arabinosyl)-glucoside                          | Putative identification. Ref. [53]                                                             | Isoquercitrin. Sigma-Aldrich. Cat. No.: 00140585. Purity ≥95%. Conversion factor (difference in MW): 0.78.                           |
| Quercetin 3- <i>O</i> -(6''- <i>O</i> -arabinosyl)-glucoside                          |                                                                                                |                                                                                                                                      |
| Quercetin 3- <i>O</i> -neohesperidoside                                               | Quercetin 3- <i>O</i> -neohesperidoside. MedChemExpress. Cat. No.: HY-N7976. Purity ≥99.54%.   | Quercetin 3- <i>O</i> -neohesperidoside. MedChemExpress. Cat. No.: HY-N7976. Purity ≥99.54%.                                         |
| Quercetin 3- <i>O</i> -rungsoside                                                     | Laboratory collection. Ref. [54]                                                               | Rutin. Sigma-Aldrich. Cat. No.: R5143. Purity ≥94%.                                                                                  |
| Quercetin 3- <i>O</i> -(4''- <i>O</i> -rhamnosyl)-glucoside                           |                                                                                                |                                                                                                                                      |
| Quercetin 3- <i>O</i> -rutinoside                                                     | Rutin. Sigma-Aldrich. Cat. No.: R5143. Purity ≥94%.                                            | Rutin. Sigma-Aldrich. Cat. No.: R5143. Purity ≥94%.                                                                                  |
| Quercetin 3- <i>O</i> -sophoroside                                                    | Quercetin 3- <i>O</i> -sophoroside. ChemFaces. Cat. No.: CFN90630. Purity ≥98%.                | Quercetin 3- <i>O</i> -sophoroside. ChemFaces. Cat. No.: CFN90630. Purity ≥98%.                                                      |
| Quercetin 3- <i>O</i> -gentiobioside                                                  | Quercetin 3- <i>O</i> -gentiobioside. MedChemExpress. Cat. No.: HY-N4089. Purity ≥99.92%.      | Quercetin 3- <i>O</i> -gentiobioside. MedChemExpress. Cat. No.: HY-N4089. Purity ≥99.92%.                                            |
| Quercetin 3- <i>O</i> -(2''- <i>O</i> -acetyl)-glucoside                              | Laboratory collection. Ref. [55]                                                               | Quercetin 3- <i>O</i> -(6-acetylglucoside). Extrasynthese. Cat. No.: 1099. Purity ≥85%.                                              |
| Quercetin 3- <i>O</i> -(3''- <i>O</i> -acetyl)-glucoside                              |                                                                                                |                                                                                                                                      |
| Quercetin 3- <i>O</i> -(4''- <i>O</i> -acetyl)-glucoside                              |                                                                                                |                                                                                                                                      |
| Quercetin 3- <i>O</i> -(6''- <i>O</i> -acetyl)-glucoside                              | Quercetin 3- <i>O</i> -(6-acetylglucoside). Extrasynthese. Cat. No.: 1099. Purity ≥85%.        | Quercetin 3- <i>O</i> -(6-acetylglucoside). Extrasynthese. Cat. No.: 1099. Purity ≥85%.                                              |
| Isorhamnetin 3- <i>O</i> -(2''- <i>O</i> -acetyl)-glucoside                           | Laboratory collection. Ref. [54]                                                               | Isorhamnetin 3- <i>O</i> -glucoside. MedChemExpress. Cat. No.: HY-N0777. Purity ≥99.95%. Conversion factor (difference in MW): 0.92. |
| Isorhamnetin 3- <i>O</i> -(6''- <i>O</i> -acetyl)-glucoside                           |                                                                                                |                                                                                                                                      |



|                                                                                                                                       |                                                                                                                                  |                                                                                                                                                                              |
|---------------------------------------------------------------------------------------------------------------------------------------|----------------------------------------------------------------------------------------------------------------------------------|------------------------------------------------------------------------------------------------------------------------------------------------------------------------------|
| Apigenin                                                                                                                              | Apigenin. ChemFaces. Cat. No.: CFN98843. Purity ≥98%.                                                                            | Apigenin. ChemFaces. Cat. No.: CFN98843. Purity ≥98%.                                                                                                                        |
| Luteolin                                                                                                                              | Luteolin. ChemFaces. Cat. No.: CFN98784. Purity ≥98%.                                                                            | Luteolin. ChemFaces. Cat. No.: CFN98784. Purity ≥98%.                                                                                                                        |
| Cirsiliol                                                                                                                             | Cirsiliol. MedChemExpress. Cat. No.: HY-110399. Purity ≥99.25%.                                                                  | Cirsiliol. MedChemExpress. Cat. No.: HY-110399. Purity ≥99.25%.                                                                                                              |
| Cirsilineol                                                                                                                           | Cirsilineol. MedChemExpress. Cat. No.: HY-119347. Purity ≥98%.                                                                   | Cirsilineol. MedChemExpress. Cat. No.: HY-119347. Purity ≥98%.                                                                                                               |
| Axillarin                                                                                                                             | Axillarin. ChemFaces. Cat. No.: CFN89530. Purity ≥98%.                                                                           | Axillarin. ChemFaces. Cat. No.: CFN89530. Purity ≥98%.                                                                                                                       |
| Chrysosplenetin                                                                                                                       | Chrysosplenetin. ChemFaces. Cat. No.: CFN97026. Purity ≥98%.                                                                     | Chrysosplenetin. ChemFaces. Cat. No.: CFN97026. Purity ≥98%.                                                                                                                 |
| <i>Phenylamines</i>                                                                                                                   |                                                                                                                                  |                                                                                                                                                                              |
| Tri- <i>O-p</i> -coumaroyl spermines                                                                                                  | Putative identification. Ref. [S16]                                                                                              | <i>N</i> 1, <i>N</i> 5, <i>N</i> 10-( <i>E</i> )-Tri- <i>p</i> -coumaroylspermidine. ChemFaces. Cat. No.: CFN95256. Purity ≥98%. Conversion factor (difference in MW): 0.91. |
| Tetra- <i>O-p</i> -coumaroyl spermines                                                                                                | Putative identification. Ref. [S16]                                                                                              | <i>N</i> 1, <i>N</i> 5, <i>N</i> 10-( <i>E</i> )-Tri- <i>p</i> -coumaroylspermidine. ChemFaces. Cat. No.: CFN95256. Purity ≥98%. Conversion factor (difference in MW): 0.74. |
| <i>N</i> <sup>1</sup> , <i>N</i> <sup>5</sup> , <i>N</i> <sup>10</sup> -Tri- <i>O</i> -( <i>EEE</i> )- <i>p</i> -coumaroyl-spermidine | <i>N</i> 1, <i>N</i> 5, <i>N</i> 10-( <i>E</i> )-Tri- <i>p</i> -coumaroylspermidine. ChemFaces. Cat. No.: CFN95256. Purity ≥98%. | <i>N</i> 1, <i>N</i> 5, <i>N</i> 10-( <i>E</i> )-Tri- <i>p</i> -coumaroylspermidine. ChemFaces. Cat. No.: CFN95256. Purity ≥98%.                                             |

**Table S5.** HPLC and mass-spectral conditions used for metabolite separation and identification.

| Mode No,<br>SPE Eluate                                                                                                                                                                                                    | Column                                                                                                                       | Column<br>temp., °C             | Eluents A/B Com-<br>position                           | Gradient Program, %B                                                                                      | Flow Rate,<br>µL/min |
|---------------------------------------------------------------------------------------------------------------------------------------------------------------------------------------------------------------------------|------------------------------------------------------------------------------------------------------------------------------|---------------------------------|--------------------------------------------------------|-----------------------------------------------------------------------------------------------------------|----------------------|
| Mode 1 (for <i>Artemisia<br/>jacutica</i> , <i>Carduus nutans</i><br>subsp. <i>leiophyllum</i> , <i>Cirsium<br/>heterophyllum</i> , <i>Echinops<br/>davuricus</i> , <i>Ixeris chinensis</i><br>subsp. <i>versicolor</i> ) | ReproSil-Pur 120 C18-AQ<br>(4.6 × 250 mm, 5 µm; Dr.<br>Maisch GmbH,<br>Ammerbuch, Germany)                                   | 30                              | A: 0.1% HCOOH in<br>water;<br>B: 0.1% HCOOH in<br>MeCN | 0–20 min 2–80% B, 20–30 min<br>80–100% B, 30–35 min 100%<br>B, 35–40 min 100–2% B                         | 150                  |
| Mode 2<br>(for <i>Lactuca sibirica</i> )                                                                                                                                                                                  | ReproSil-Pur 120 C18-AQ<br>(4.6 × 250 mm, 5 µm; Dr.<br>Maisch GmbH,<br>Ammerbuch, Germany)                                   | 25                              | A: 0.1% HCOOH in<br>water;<br>B: 0.1% HCOOH in<br>MeCN | 0–10 min 2–54% B, 10–20 min<br>54–75% B, 20–30 min 75–<br>100% B, 30–35 min 100% B,<br>35–40 min 100–2% B | 150                  |
|                                                                                                                                                                                                                           | Injection Volume, µL                                                                                                         | UV-Vis<br>spectral<br>range, nm | ESI Mode                                               | Temperature ESI Interface /<br>Desolvation Line / Heat<br>Block, °C                                       |                      |
| Mode 1 (for <i>Artemisia<br/>jacutica</i> , <i>Carduus nutans</i><br>subsp. <i>leiophyllum</i> , <i>Cirsium<br/>heterophyllum</i> , <i>Echinops<br/>davuricus</i> , <i>Ixeris chinensis</i><br>subsp. <i>versicolor</i> ) | 10                                                                                                                           | 200–600                         | Negative                                               | 300 / 200 / 400                                                                                           |                      |
| Mode 2<br>(for <i>Lactuca sibirica</i> )                                                                                                                                                                                  | 10                                                                                                                           | 200–600                         | Negative                                               | 300 / 200 / 400                                                                                           |                      |
|                                                                                                                                                                                                                           | Flow Rate Nebulizing Gas<br>(N <sub>2</sub> ) / Heating Gas (air) /<br>Collision-Induced<br>Dissociation Gas (Ar),<br>µL/min | Source<br>Voltage,<br>kV        | Collision Energy,<br>eV                                | MS Scanning Range, m/z                                                                                    |                      |
| Mode 1 (for <i>Artemisia<br/>jacutica</i> , <i>Carduus nutans</i><br>subsp. <i>leiophyllum</i> , <i>Cirsium<br/>heterophyllum</i> , <i>Echinops<br/>davuricus</i> , <i>Ixeris chinensis</i><br>subsp. <i>versicolor</i> ) | 3 / 10 / 0.3                                                                                                                 | 3                               | –10–35                                                 | 80–2000                                                                                                   |                      |
| Mode 2<br>(for <i>Lactuca sibirica</i> )                                                                                                                                                                                  | 3 / 10 / 0.3                                                                                                                 | 3                               | –10–35                                                 | 80–2000                                                                                                   |                      |

**Table S6.** Regression equations, correlation coefficients ( $r^2$ ), standard deviation ( $S_{YX}$ ), limits of detection (LOD), limits of quantification (LOQ) and linear ranges for 55 reference standards.

| Compound                                                                                | Ionization<br><sup>a</sup> | CE <sup>b</sup><br>(eV) | Regression equation <sup>c</sup> |                | $r^2$  | $S_{YX}$               | LOD/<br>LOQ<br>( $\mu\text{g/mL}$ ) | Linear range<br>( $\mu\text{g/mL}$ ) |
|-----------------------------------------------------------------------------------------|----------------------------|-------------------------|----------------------------------|----------------|--------|------------------------|-------------------------------------|--------------------------------------|
|                                                                                         |                            |                         | $a$                              | $b \cdot 10^6$ |        |                        |                                     |                                      |
| Protocatechuic acid 4- <i>O</i> - $\beta$ -glucoside                                    | N                          | -30                     | 0.9114                           | -0.6312        | 0.9887 | 6.37·10 <sup>-2</sup>  | 0.23/0.70                           | 0.7–100.0                            |
| Vanillic acid 4- $\beta$ -D-glucoside                                                   | N                          | -15                     | 1.0864                           | -0.5271        | 0.9983 | 1.04·10 <sup>-2</sup>  | 0.03/0.10                           | 0.10–500.0                           |
| Cichoriin                                                                               | N                          | -25                     | 1.3620                           | -0.0820        | 0.9961 | 9.91·10 <sup>-2</sup>  | 0.21/0.72                           | 0.8–100.0                            |
| <i>trans</i> -Caffeoyl-6- <i>O</i> -D-gluconic acid                                     | N                          | -35                     | 0.9562                           | -0.0521        | 0.9971 | 7.79·10 <sup>-2</sup>  | 0.27/0.82                           | 0.9–100.0                            |
| Caftaric acid                                                                           | N                          | -10                     | 2.6538                           | -0.1376        | 0.9990 | 1.17·10 <sup>-2</sup>  | 0.01/0.04                           | 0.10–100.0                           |
| Cichoric acid                                                                           | N                          | -15                     | 1.9478                           | -0.2369        | 0.9984 | 1.03·10 <sup>-2</sup>  | 0.02/0.05                           | 0.05–250.0                           |
| Coutaric acid                                                                           | N                          | -10                     | 1.5632                           | -0.0376        | 0.9983 | 5.14·10 <sup>-2</sup>  | 0.11/0.33                           | 0.40–100.0                           |
| 3- <i>O</i> - <i>p</i> -Coumaroylquinic acid                                            | N                          | -25                     | 1.0627                           | -1.2531        | 0.9893 | 0.62·10 <sup>-2</sup>  | 0.02/0.06                           | 0.10–400.0                           |
| 4- <i>O</i> -Coumaroylquinic acid                                                       | N                          | -20                     | 1.4689                           | -0.3641        | 0.9990 | 5.69·10 <sup>-2</sup>  | 0.12/0.38                           | 0.40–400.0                           |
| 5- <i>O</i> -Coumaroylquinic acid                                                       | N                          | -20                     | 2.6340                           | -0.2411        | 0.9973 | 2.74·10 <sup>-2</sup>  | 0.03/0.10                           | 0.10–350.0                           |
| Chlorogenic acid                                                                        | N                          | -15                     | 2.4176                           | -1.5647        | 0.9994 | 0.40·10 <sup>-2</sup>  | 0.005/0.02                          | 0.02–300.0                           |
| Cryptochlorogenic acid                                                                  | N                          | -15                     | 2.7365                           | -1.0690        | 0.9996 | 0.51·10 <sup>-2</sup>  | 0.006/0.02                          | 0.02–300.0                           |
| Neochlorogenic acid                                                                     | N                          | -15                     | 2.9021                           | -1.4184        | 0.9998 | 0.39·10 <sup>-2</sup>  | 0.004/0.01                          | 0.02–300.0                           |
| <i>Cis</i> -5-Caffeoylquinic acid                                                       | N                          | -15                     | 5.8022                           | -0.8040        | 0.9990 | 1.14·10 <sup>-2</sup>  | 0.007/0.02                          | 0.02–500.0                           |
| 3,4-Dicaffeoylquinic acid                                                               | N                          | -10                     | 0.1756                           | -0.0144        | 0.9967 | 3.01·10 <sup>-2</sup>  | 0.56/1.71                           | 2.00–850.0                           |
| 3,5-Di- <i>O</i> -caffeoylquinic acid                                                   | N                          | -20                     | 1.4412                           | -0.6211        | 0.9930 | 11.25·10 <sup>-2</sup> | 0.26/0.78                           | 0.80–100.0                           |
| 4,5-Di- <i>O</i> -caffeoyl quinic acid                                                  | N                          | -15                     | 1.1123                           | -1.0289        | 0.9862 | 0.41·10 <sup>-2</sup>  | 0.01/0.04                           | 0.05–400.0                           |
| 3- <i>O</i> -Feruloyl quinic acid                                                       | N                          | -20                     | 0.9562                           | -0.0521        | 0.9971 | 7.79·10 <sup>-2</sup>  | 0.27/0.82                           | 0.90–100.0                           |
| 4- <i>O</i> -Feruloyl quinic acid                                                       | N                          | -20                     | 1.3387                           | -0.0284        | 0.9981 | 9.50·10 <sup>-2</sup>  | 0.23/0.71                           | 0.80–100.0                           |
| 5- <i>O</i> -Feruloyl quinic acid                                                       | N                          | -10                     | 0.9518                           | -0.0267        | 0.9990 | 1.03·10 <sup>-2</sup>  | 0.03/0.10                           | 0.10–100.0                           |
| Apigenin 7- <i>O</i> -glucoside                                                         | N                          | -30                     | 1.1269                           | -0.9560        | 0.9864 | 0.93·10 <sup>-2</sup>  | 0.02/0.08                           | 0.10–400.0                           |
| Apigenin 7- <i>O</i> -glucuronide                                                       | N                          | -15                     | 3.6748                           | -0.7069        | 0.9987 | 0.90·10 <sup>-2</sup>  | 0.008/0.02                          | 0.02–400.0                           |
| Isorhoifolin                                                                            | N                          | -15                     | 4.9634                           | -0.5047        | 0.9972 | 0.63·10 <sup>-2</sup>  | 0.004/0.01                          | 0.01–400.0                           |
| Apigenin 4'- <i>O</i> -(2'',6''-di- <i>O</i> - <i>E</i> - <i>p</i> -coumaroyl)glucoside | N                          | -30                     | 2.3312                           | -0.4563        | 0.9803 | 14.92·10 <sup>-2</sup> | 0.21/0.64                           | 0.7–100.0                            |
| Apigenin 7- <i>O</i> -glucoside                                                         | N                          | -25                     | 1.1492                           | -0.6010        | 0.9980 | 4.68·10 <sup>-2</sup>  | 0.14/0.41                           | 0.50–400.0                           |
| Schaftoside                                                                             | N                          | -20                     | 1.4412                           | -0.6211        | 0.9930 | 11.25·10 <sup>-2</sup> | 0.26/0.78                           | 0.8–100.0                            |
| Tilianin                                                                                | N                          | -25                     | 1.3620                           | -0.0820        | 0.9961 | 9.91·10 <sup>-2</sup>  | 0.21/0.72                           | 0.8–100.0                            |
| Luteolin 5- <i>O</i> -glucoside                                                         | N                          | -25                     | 1.9634                           | -0.7458        | 0.9963 | 2.59·10 <sup>-2</sup>  | 0.04/0.14                           | 0.20–350.0                           |
| Luteolin 7-glucoside                                                                    | N                          | -20                     | 1.8233                           | -0.7962        | 0.9975 | 2.02·10 <sup>-2</sup>  | 0.04/0.11                           | 0.20–350.0                           |
| Luteolin 3'-glucoside                                                                   | N                          | -15                     | 2.0330                           | -0.2516        | 0.9992 | 1.09·10 <sup>-2</sup>  | 0.02/0.05                           | 0.05–300.0                           |
| Luteolin 4'- <i>O</i> -glucoside                                                        | N                          | -10                     | 0.1537                           | -0.0189        | 0.9960 | 3.83·10 <sup>-2</sup>  | 0.82/2.49                           | 2.50–850.0                           |
| Luteolin 7-rutinoside                                                                   | N                          | -30                     | 1.3722                           | -0.0829        | 0.9973 | 9.93·10 <sup>-2</sup>  | 0.24/0.72                           | 0.80–100.0                           |
| Chrysoeriol 7- <i>O</i> -glucoside                                                      | N                          | -30                     | 1.3620                           | -0.0820        | 0.9961 | 9.91·10 <sup>-2</sup>  | 0.21/0.72                           | 0.80–100.0                           |
| 6-Hydroxyluteolin 7- <i>O</i> -glucoside                                                | N                          | -20                     | 1.0634                           | -0.0933        | 0.9902 | 10.01·10 <sup>-2</sup> | 0.31/0.94                           | 1.00–100.0                           |
| Pectolinarigenin 7- <i>O</i> -glucoside                                                 | N                          | -10                     | 1.9610                           | -0.5271        | 0.9993 | 0.94·10 <sup>-2</sup>  | 0.02/0.05                           | 0.05–250.0                           |
| Kaempferol 3- <i>O</i> -neohesperidoside                                                | N                          | -15                     | 1.1105                           | -0.3211        | 0.9937 | 4.18·10 <sup>-2</sup>  | 0.12/0.38                           | 0.40–400.0                           |
| Nicotiflorin                                                                            | N                          | -30                     | 1.9634                           | -0.4511        | 0.9952 | 9.18·10 <sup>-2</sup>  | 0.15/0.46                           | 0.5–100.0                            |
| Kempferol 3- <i>O</i> -sophoroside                                                      | N                          | -10                     | 1.4611                           | -0.0731        | 0.9982 | 4.08·10 <sup>-2</sup>  | 0.09/0.27                           | 0.30–100.0                           |
| Kaempferol 3-gentiobioside                                                              | N                          | -10                     | 1.5330                           | -0.0863        | 0.9985 | 4.15·10 <sup>-2</sup>  | 0.09/0.27                           | 0.30–100.0                           |
| Kaempferol 7- <i>O</i> -glucoside                                                       | N                          | -20                     | 2.0859                           | -0.9171        | 0.9980 | 6.18·10 <sup>-2</sup>  | 0.03/0.09                           | 0.1–100.0                            |
| Isoquercitrin                                                                           | N                          | -10                     | 1.6278                           | -0.0428        | 0.9990 | 7.11·10 <sup>-2</sup>  | 0.14/0.44                           | 0.50–100.0                           |
| Quercetin 3-D-galactoside                                                               | N                          | -10                     | 0.2569                           | -0.0316        | 0.9973 | 2.52·10 <sup>-2</sup>  | 0.33/1.00                           | 1.00–750.0                           |
| Quercetin 3- <i>O</i> -neohesperidoside                                                 | N                          | -20                     | 1.9871                           | -0.6871        | 0.9984 | 5.63·10 <sup>-2</sup>  | 0.09/0.28                           | 0.40–400.0                           |
| Rutin                                                                                   | N                          | -20                     | 1.2716                           | -0.7389        | 0.9897 | 9.14·10 <sup>-2</sup>  | 0.23/0.72                           | 0.80–400.0                           |
| Quercetin 3- <i>O</i> -sophoroside                                                      | N                          | -20                     | 1.6705                           | -0.4374        | 0.9988 | 12.79·10 <sup>-2</sup> | 0.25/0.77                           | 0.8–100.0                            |
| Quercetin 3- <i>O</i> -gentiobioside                                                    | N                          | -20                     | 1.2703                           | -0.7911        | 0.9814 | 15.26·10 <sup>-2</sup> | 0.40/1.20                           | 1.5–100.0                            |
| Quercetin-3- <i>O</i> -(6-acetylglucoside)                                              | N                          | -20                     | 1.1103                           | -0.9217        | 0.9901 | 14.33·10 <sup>-2</sup> | 0.42/1.29                           | 1.5–100.0                            |
| Isorhamnetin 3- <i>O</i> -glucoside                                                     | N                          | -15                     | 0.9375                           | -0.7631        | 0.9982 | 1.42·10 <sup>-2</sup>  | 0.05/0.15                           | 0.20–350.0                           |

|                                                  |   |     |        |         |        |                        |            |            |
|--------------------------------------------------|---|-----|--------|---------|--------|------------------------|------------|------------|
| Apigenin                                         | N | -20 | 2.4751 | -0.2081 | 0.9976 | 2.04·10 <sup>-2</sup>  | 0.03/0.10  | 0.10–350.0 |
| Luteolin                                         | N | -20 | 1.8267 | -0.4160 | 0.9990 | 11.73·10 <sup>-2</sup> | 0.21/0.67  | 0.70–400.0 |
| Cirsiliol                                        | N | -15 | 1.1541 | -0.4691 | 0.9987 | 1.06·10 <sup>-2</sup>  | 0.03/0.10  | 0.10–350.0 |
| Cirsilineol                                      | N | -20 | 2.0384 | -0.3640 | 0.9975 | 2.02·10 <sup>-2</sup>  | 0.03/0.10  | 0.10–350.0 |
| Axillarin                                        | N | -10 | 1.2416 | -0.3615 | 0.9901 | 3.02·10 <sup>-2</sup>  | 0.08/0.24  | 0.3–100.0  |
| Chrysosplenetin                                  | N | -15 | 7.064  | -1.533  | 0.9992 | 1.92·10 <sup>-2</sup>  | 0.009/0.03 | 0.03–500.0 |
| N1,N5,N10-(E)-Tri- <i>p</i> -coumaroylspermidine | N | -10 | 0.9911 | -0.0379 | 0.9988 | 2.05·10 <sup>-2</sup>  | 0.07/0.21  | 0.3–100.0  |

<sup>a</sup> Ionization mode : N—negative, P—positive. <sup>b</sup> CE—collision energy. <sup>c</sup> Regression equation:  $y = a \cdot x + b$ .

**Table S7.** Retention times ( $t_R$ ), molecular formulas (MF), mass-spectral data for negative ionization (MSD), and identification level (IL) of compounds Aj-1–Aj-32 found in *Artemisia jacobitica* herb.

| No    | $t_R$ , min | Compound                                                                                          | MF                                                            | MSD, m/z                | IL |
|-------|-------------|---------------------------------------------------------------------------------------------------|---------------------------------------------------------------|-------------------------|----|
| Aj-1  | 6.00        | 3- <i>O</i> -Caffeoyl glucaric acid                                                               | C <sub>15</sub> H <sub>16</sub> O <sub>11</sub>               | 371, 179                | 1a |
| Aj-2  | 7.01        | 4- <i>O</i> -Caffeoyl glucaric acid                                                               | C <sub>15</sub> H <sub>16</sub> O <sub>11</sub>               | 371, 179                | 1a |
| Aj-3  | 7.41        | 4- <i>O</i> -Caffeoyl quinic acid ( <i>trans</i> -)                                               | C <sub>16</sub> H <sub>18</sub> O <sub>9</sub>                | 353, 179                | 1b |
| Aj-4  | 7.66        | 2- <i>O</i> -Caffeoyl glucaric acid                                                               | C <sub>15</sub> H <sub>16</sub> O <sub>11</sub>               | 371, 179                | 1a |
| Aj-5  | 8.06        | 4- <i>O</i> -Caffeoyl quinic acid ( <i>cis</i> -)                                                 | C <sub>16</sub> H <sub>18</sub> O <sub>9</sub>                | 353, 179                | 1b |
| Aj-6  | 8.71        | 5- <i>O</i> -Caffeoyl glucaric acid                                                               | C <sub>15</sub> H <sub>16</sub> O <sub>11</sub>               | 371, 179                | 1a |
| Aj-7  | 10.51       | 5- <i>O</i> -Caffeoyl quinic acid ( <i>trans</i> -)                                               | C <sub>16</sub> H <sub>18</sub> O <sub>9</sub>                | 353, 179                | 1b |
| Aj-8  | 11.28       | 3- <i>O</i> -Caffeoyl quinic acid ( <i>trans</i> -)                                               | C <sub>16</sub> H <sub>18</sub> O <sub>9</sub>                | 353, 179                | 1b |
| Aj-9  | 12.25       | 5- <i>O</i> -Caffeoyl quinic acid ( <i>cis</i> -)                                                 | C <sub>16</sub> H <sub>18</sub> O <sub>9</sub>                | 353, 179                | 1b |
| Aj-10 | 12.77       | 6-Hydroxyluteolin di- <i>O</i> -hexoside                                                          | C <sub>27</sub> H <sub>30</sub> O <sub>17</sub>               | 625, 463, 301           | 2  |
| Aj-11 | 13.71       | Schaftoside (apigenin 6- <i>C</i> -glucoside-8- <i>C</i> -arabinoside)                            | C <sub>26</sub> H <sub>28</sub> O <sub>14</sub>               | 563                     | 1b |
| Aj-12 | 13.90       | Quercetin 3- <i>O</i> -gentiobioside (quercetin 3- <i>O</i> -(6''- <i>O</i> -glucosyl)-glucoside) | C <sub>27</sub> H <sub>30</sub> O <sub>17</sub>               | 625, 463, 301           | 1b |
| Aj-13 | 14.61       | Calendoflavobioside (quercetin 3- <i>O</i> -neohesperidoside)                                     | C <sub>27</sub> H <sub>30</sub> O <sub>16</sub>               | 609, 463, 301           | 1a |
| Aj-14 | 15.05       | Rutin (quercetin 3- <i>O</i> -rutinoside)                                                         | C <sub>27</sub> H <sub>30</sub> O <sub>16</sub>               | 609, 463, 301           | 1b |
| Aj-15 | 15.41       | Calendoside II (quercetin 3- <i>O</i> -rungsioside)                                               | C <sub>27</sub> H <sub>30</sub> O <sub>16</sub>               | 609, 463, 301           | 1a |
| Aj-16 | 15.52       | Tri- <i>O</i> - <i>p</i> -coumaroyl spermine                                                      | C <sub>37</sub> H <sub>44</sub> N <sub>4</sub> O <sub>6</sub> | 639, 493, 347, 163      | 2  |
| Aj-17 | 15.92       | Calendoside I (quercetin 3- <i>O</i> -(4''- <i>O</i> -rhamnosyl)-glucoside)                       | C <sub>27</sub> H <sub>30</sub> O <sub>16</sub>               | 609, 463, 301           | 1a |
| Aj-18 | 15.94       | Tri- <i>O</i> - <i>p</i> -coumaroyl spermine                                                      | C <sub>37</sub> H <sub>44</sub> N <sub>4</sub> O <sub>6</sub> | 639, 493, 347, 163      | 2  |
| Aj-19 | 16.26       | Tri- <i>O</i> - <i>p</i> -coumaroyl spermine                                                      | C <sub>37</sub> H <sub>44</sub> N <sub>4</sub> O <sub>6</sub> | 639, 493, 347, 163      | 2  |
| Aj-20 | 16.37       | Quercetin 3- <i>O</i> -(2''- <i>O</i> -acetyl)-glucoside                                          | C <sub>23</sub> H <sub>22</sub> O <sub>13</sub>               | 505, 463, 301           | 1a |
| Aj-21 | 16.67       | Quercetin 3- <i>O</i> -(6''- <i>O</i> -acetyl)-glucoside                                          | C <sub>23</sub> H <sub>22</sub> O <sub>13</sub>               | 505, 463, 301           | 1a |
| Aj-22 | 16.81       | 3,4-Di- <i>O</i> -caffeoyl quinic acid                                                            | C <sub>25</sub> H <sub>24</sub> O <sub>12</sub>               | 515, 353, 179           | 1b |
| Aj-23 | 16.97       | 3,5-Di- <i>O</i> -caffeoyl quinic acid                                                            | C <sub>25</sub> H <sub>24</sub> O <sub>12</sub>               | 515, 353, 179           | 1b |
| Aj-24 | 17.27       | Quercetin 3- <i>O</i> -(4''- <i>O</i> -acetyl)-glucoside                                          | C <sub>23</sub> H <sub>22</sub> O <sub>13</sub>               | 505, 463, 301           | 1a |
| Aj-25 | 17.57       | 4,5-Di- <i>O</i> -caffeoyl quinic acid                                                            | C <sub>25</sub> H <sub>24</sub> O <sub>12</sub>               | 515, 353, 179           | 1b |
| Aj-26 | 18.13       | Isorhamnetin 3- <i>O</i> -(2''- <i>O</i> -acetyl)-glucoside                                       | C <sub>24</sub> H <sub>24</sub> O <sub>13</sub>               | 519, 477, 315           | 1a |
| Aj-27 | 19.12       | Isorhamnetin 3- <i>O</i> -(6''- <i>O</i> -acetyl)-glucoside                                       | C <sub>24</sub> H <sub>24</sub> O <sub>13</sub>               | 519, 477, 315           | 1a |
| Aj-28 | 24.17       | Tetra- <i>O</i> - <i>p</i> -coumaroyl spermine                                                    | C <sub>46</sub> H <sub>50</sub> N <sub>4</sub> O <sub>8</sub> | 785, 639, 493, 347, 163 | 2  |
| Aj-29 | 24.80       | Cirsiliol                                                                                         | C <sub>17</sub> H <sub>14</sub> O <sub>7</sub>                | 329                     | 1b |
| Aj-30 | 25.01       | Axyllarin                                                                                         | C <sub>17</sub> H <sub>14</sub> O <sub>8</sub>                | 345                     | 1b |
| Aj-31 | 27.10       | Cirsilineol                                                                                       | C <sub>18</sub> H <sub>16</sub> O <sub>7</sub>                | 343                     | 1b |
| Aj-32 | 27.37       | Chrysosplenetin                                                                                   | C <sub>19</sub> H <sub>18</sub> O <sub>8</sub>                | 373                     | 1b |

\* Identification levels: (1) identified compounds after comparison of retention times, UV and mass-spectral data with previously isolated compounds (1a) or commercial reference standard (1b); (2) putatively annotated compounds after comparison of retention times, UV and mass-spectral data with literature data.

**Table S8.** Retention times ( $t_R$ ), molecular formulas (MF), mass-spectral data for negative ionization (MSD), and identification level (IL) of compounds Cn-1–Cn-20 found in *Carduus nutans* subsp. *leiophyllus* herb.

| No    | $t_R$ , min | Compound                                                                                              | MF                                              | MSD, m/z           | IL |
|-------|-------------|-------------------------------------------------------------------------------------------------------|-------------------------------------------------|--------------------|----|
| Cn-1  | 6.27        | Protocatechuic acid <i>O</i> -hexoside (Cn-3 isomer)                                                  | C <sub>13</sub> H <sub>16</sub> O <sub>9</sub>  | 315, 153           | 2  |
| Cn-2  | 6.41        | Protocatechuic acid <i>O</i> -hexoside (Cn-3 isomer)                                                  | C <sub>13</sub> H <sub>16</sub> O <sub>9</sub>  | 315, 153           | 2  |
| Cn-3  | 6.81        | Protocatechuic acid 4- <i>O</i> -glucoside                                                            | C <sub>13</sub> H <sub>16</sub> O <sub>9</sub>  | 315, 153           | 1b |
| Cn-4  | 8.01        | 4- <i>O</i> -Caffeoyl quinic acid ( <i>cis</i> -)                                                     | C <sub>16</sub> H <sub>18</sub> O <sub>9</sub>  | 353, 179           | 1b |
| Cn-5  | 9.84        | Caffeoyl quinic acid (Cn-4/7/8 isomer)                                                                | C <sub>16</sub> H <sub>18</sub> O <sub>9</sub>  | 353, 179           | 2  |
| Cn-6  | 10.12       | 4- <i>O-p</i> -Coumaroyl quinic acid                                                                  | C <sub>16</sub> H <sub>18</sub> O <sub>8</sub>  | 337, 163           | 1a |
| Cn-7  | 10.44       | 5- <i>O</i> -Caffeoyl quinic acid ( <i>trans</i> -)                                                   | C <sub>16</sub> H <sub>18</sub> O <sub>9</sub>  | 353, 179           | 1b |
| Cn-8  | 10.70       | 3- <i>O</i> -Caffeoyl quinic acid ( <i>trans</i> -)                                                   | C <sub>16</sub> H <sub>18</sub> O <sub>9</sub>  | 353, 179           | 1b |
| Cn-9  | 11.02       | 4- <i>O</i> -Feruloyl quinic acid                                                                     | C <sub>17</sub> H <sub>20</sub> O <sub>9</sub>  | 337, 163           | 1a |
| Cn-10 | 12.53       | 5- <i>O-p</i> -Coumaroyl quinic acid                                                                  | C <sub>16</sub> H <sub>18</sub> O <sub>8</sub>  | 337, 163           | 1b |
| Cn-11 | 13.17       | 3- <i>O-p</i> -Coumaroyl quinic acid                                                                  | C <sub>16</sub> H <sub>18</sub> O <sub>8</sub>  | 337, 163           | 1b |
| Cn-12 | 13.50       | 5- <i>O</i> -Feruloyl quinic acid                                                                     | C <sub>17</sub> H <sub>20</sub> O <sub>9</sub>  | 337, 163           | 1b |
| Cn-13 | 14.08       | 3- <i>O</i> -Feruloyl quinic acid                                                                     | C <sub>17</sub> H <sub>20</sub> O <sub>9</sub>  | 337, 163           | 1a |
| Cn-14 | 14.83       | Luteolin 7- <i>O</i> -(2''- <i>O</i> -glucosyl)-glucoside                                             | C <sub>27</sub> H <sub>30</sub> O <sub>16</sub> | 609, 447, 285      | 1b |
| Cn-15 | 15.15       | Luteolin <i>O</i> -hexoside- <i>O</i> -pentoside                                                      | C <sub>26</sub> H <sub>28</sub> O <sub>15</sub> | 579, 447, 285      | 2  |
| Cn-16 | 16.08       | Luteolin 7- <i>O</i> -(2''- <i>O</i> -(6'''- <i>O</i> -acetyl)-glucosyl)-glucoside (linariifolioside) | C <sub>29</sub> H <sub>32</sub> O <sub>17</sub> | 651, 609, 447, 285 | 1c |
| Cn-17 | 16.85       | Luteolin di- <i>O</i> -hexoside- <i>O</i> -acetate (Cn-16 isomer)                                     | C <sub>29</sub> H <sub>32</sub> O <sub>17</sub> | 651, 609, 447, 285 | 2  |
| Cn-18 | 17.04       | Apigenin di- <i>O</i> -hexoside- <i>O</i> -acetate                                                    | C <sub>29</sub> H <sub>32</sub> O <sub>16</sub> | 635, 593, 431, 269 | 2  |
| Cn-19 | 17.18       | Apigenin di- <i>O</i> -hexoside- <i>O</i> -acetate                                                    | C <sub>29</sub> H <sub>32</sub> O <sub>16</sub> | 635, 593, 431, 269 | 2  |
| Cn-20 | 17.30       | Chrysoeriol 7- <i>O</i> -(2''- <i>O</i> -(6'''- <i>O</i> -acetyl)-glucosyl)-glucoside                 | C <sub>30</sub> H <sub>34</sub> O <sub>17</sub> | 665, 623, 461, 299 | 1c |

\* Identification levels: (1) identified compounds after comparison of retention times, UV and mass-spectral data with previously isolated compounds (1a) or commercial reference standard (1b) or isolated in present work (1c); (2) putatively annotated compounds after comparison of retention times, UV and mass-spectral data with literature data.



**Table S9.** Extraction/chromatography conditions and spectral data of luteolin 7-O-(2''-O-(6'''-O-acetyl)-glucosyl)-glucoside and chrysoeriol 7-O-(2''-O-(6'''-O-acetyl)-glucosyl)-glucoside isolated from *Carduus nutans* subsp. *leiophyllus* leaves.

| Parameter                                                                                                                                                    | Description                                                                                                                                                                                                                                                                                                                                                                                                                                                                                                                                                                                                                                                                                                                                                                                                                                                                                                                                                                                                                                                                                                                                                                                                                                                                                                                                                                                                                                                                                                                                                                                                                                                                                                                                                                                                                  |
|--------------------------------------------------------------------------------------------------------------------------------------------------------------|------------------------------------------------------------------------------------------------------------------------------------------------------------------------------------------------------------------------------------------------------------------------------------------------------------------------------------------------------------------------------------------------------------------------------------------------------------------------------------------------------------------------------------------------------------------------------------------------------------------------------------------------------------------------------------------------------------------------------------------------------------------------------------------------------------------------------------------------------------------------------------------------------------------------------------------------------------------------------------------------------------------------------------------------------------------------------------------------------------------------------------------------------------------------------------------------------------------------------------------------------------------------------------------------------------------------------------------------------------------------------------------------------------------------------------------------------------------------------------------------------------------------------------------------------------------------------------------------------------------------------------------------------------------------------------------------------------------------------------------------------------------------------------------------------------------------------|
| Plant extraction / chromatography                                                                                                                            | Powdered plant material (leaves, sample CNW-1; 5 kg) was extracted with MeOH in a Soxhlet apparatus. The extract was concentrated, which led to the formation of a precipitate (170 g) that was separated over Sephadex LH-20 [column chromatography, eluent EtOH (70%)] and SiO <sub>2</sub> (column chromatography, eluent hexane–EtOAc, 80:20→60:40) to isolate luteolin 7-O-(2''-O-(6'''-O-acetyl)-glucosyl)-glucoside (51 g) [69] and chrysoeriol 7-O-(2''-O-(6'''-O-acetyl)-glucosyl)-glucoside (35 g) [70].                                                                                                                                                                                                                                                                                                                                                                                                                                                                                                                                                                                                                                                                                                                                                                                                                                                                                                                                                                                                                                                                                                                                                                                                                                                                                                           |
| Luteolin 7-O-(2''-O-(6'''-O-acetyl)-glucosyl)-glucoside (linariifolioside) 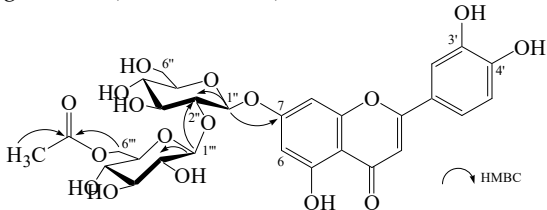 | C <sub>29</sub> H <sub>32</sub> O <sub>17</sub> . UV (MeOH, λ <sub>max</sub> , nm): 252, 268, 348. HR-ESI-MS, <i>m/z</i> 651.3281 [M – H] <sup>–</sup> (calcd. for C <sub>29</sub> H <sub>31</sub> O <sub>17</sub> , 651.5500). ESI-MS, <i>m/z</i> (%): 651 (100) [M – H] <sup>–</sup> , 609 (33) [(M – H) – acetyl] <sup>–</sup> , 447 (25) [(M – H) – acetyl – glucose] <sup>–</sup> , 285 (64) [(M – H) – acetyl – 2 × glucose] <sup>–</sup> . <sup>1</sup> H NMR (500 MHz, DMSO-d <sub>6</sub> , 298 K, δ, ppm, J/Hz): luteolin – 6.62 (1H, s; C-3), 6.35 (1H, s; C-6), 6.70 (1H, s; H-8), 7.42 (1H, d, J = 2.0; H-2'), 6.95 (1H, d, J = 8.0; H-5'), 7.45 (1H, dd, J = 2.0, 8.0; H-6'); 7-O-glucose – 5.35 (1H, d, J = 7.0; H-1''), 3.64 (1H, m; H-2''), 3.21–3.48 (6H, m; H-3'', H-4'', H-5'', H-3''', H-4''', H-5'''), 3.52 (1H, m; H-6'' <sub>B</sub> ), 3.76 (1H, m; H-6'' <sub>A</sub> ); 2''-O-glucose – 4.73 (1H, d, J = 8.0; H-1'''), 3.01 (1H, m; H-2'''), 3.21–3.48 (6H, m; H-3''', H-4''', H-5''', H-3''''', H-4''''', H-5'''''), 3.80 (1H, m; H-6''' <sub>B</sub> ), 3.92 (1H, m; H-6''' <sub>A</sub> ); 6'''-O-acetyl – 1.85 (3H, s; COCH <sub>3</sub> ). <sup>13</sup> C NMR (125 MHz, DMSO-d <sub>6</sub> , 298 K, δ, ppm): luteolin – 163.5 (C-2), 104.5 (C-3), 181.7 (C-4), 161.3 (C-5), 99.6 (C-6), 162.5 (C-7), 95.0 (C-8), 153.2 (C-9), 106.3 (C-10), 120.9 (C-1'), 113.0 (C-2'), 146.2 (C-3'), 149.1 (C-4'), 115.6 (C-5'), 119.0 (C-6'); 7-O-glucose – 99.5 (C-1''), 92.5 (C-2''), 75.2 (C-3''), 68.7 (C-4''), 76.9 (C-5''), 60.1 (C-6''); 2''-O-glucose – 104.2 (C-1'''), 74.1 (C-2'''), 75.8 (C-3'''), 69.5 (C-4'''), 73.6 (C-5'''), 62.7 (C-6'''); 6'''-O-acetyl – 20.1 (COCH <sub>3</sub> ), 170.5 (COCH <sub>3</sub> ).                                                                        |
| Chrysoeriol 7-O-(2''-O-(6'''-O-acetyl)-glucosyl)-glucoside                | C <sub>30</sub> H <sub>34</sub> O <sub>17</sub> . UV (MeOH, λ <sub>max</sub> , nm): 251, 267, 348. HR-ESI-MS, <i>m/z</i> 665.4217 [M – H] <sup>–</sup> (calcd. for C <sub>30</sub> H <sub>33</sub> O <sub>17</sub> , 665.5770). ESI-MS, <i>m/z</i> (%): 665 (100) [M – H] <sup>–</sup> , 623 (35) [(M – H) – acetyl] <sup>–</sup> , 461 (14) [(M – H) – acetyl – glucose] <sup>–</sup> , 299 (54) [(M – H) – acetyl – 2 × glucose] <sup>–</sup> . <sup>1</sup> H NMR (500 MHz, DMSO-d <sub>6</sub> , 298 K, δ, ppm, J/Hz): chrysoeriol – 6.61 (1H, s; C-3), 6.33 (1H, s; C-6), 6.69 (1H, s; H-8), 7.56 (1H, d, J = 2.0; H-2'), 6.92 (1H, d, J = 8.0; H-5'), 7.48 (1H, dd, J = 2.0, 8.0; H-6'), 3.85 (3H, c; 3'-OCH <sub>3</sub> ); 7-O-glucose – 5.37 (1H, d, J = 7.0; H-1''), 3.61 (1H, m; H-2''), 3.19–3.49 (6H, m; H-3'', H-4'', H-5'', H-3''', H-4''', H-5'''), 3.53 (1H, m; H-6'' <sub>B</sub> ), 3.79 (1H, m; H-6'' <sub>A</sub> ); 2''-O-glucose – 4.78 (1H, d, J = 8.0; H-1'''), 3.03 (1H, m; H-2'''), 3.19–3.49 (6H, m; H-3''', H-4''', H-5''', H-3''''', H-4''''', H-5'''''), 3.81 (1H, m; H-6''' <sub>B</sub> ), 3.96 (1H, m; H-6''' <sub>A</sub> ); 6'''-O-acetyl – 1.87 (3H, s; COCH <sub>3</sub> ). <sup>13</sup> C NMR (125 MHz, DMSO-d <sub>6</sub> , 298 K, δ, ppm): chrysoeriol – 163.3 (C-2), 104.2 (C-3), 181.5 (C-4), 161.4 (C-5), 99.7 (C-6), 162.6 (C-7), 95.2 (C-8), 153.1 (C-9), 106.2 (C-10), 121.6 (C-1'), 110.9 (C-2'), 148.1 (C-3'), 150.9 (C-4'), 115.8 (C-5'), 120.1 (C-6'); 56.1 (3'-OCH <sub>3</sub> ); 7-O-glucose – 99.7 (C-1''), 92.2 (C-2''), 75.1 (C-3''), 68.5 (C-4''), 76.7 (C-5''), 60.2 (C-6''); 2''-O-glucose – 104.0 (C-1'''), 74.0 (C-2'''), 75.5 (C-3'''), 69.6 (C-4'''), 73.4 (C-5'''), 62.9 (C-6'''); 6'''-O-acetyl – 20.2 (COCH <sub>3</sub> ), 170.3 (COCH <sub>3</sub> ). |

**Table S10.** Retention times ( $t_R$ ), molecular formulas (MF), mass-spectral data for negative ionization (MSD), and identification level (IL) of compounds Ch-1–Ch-24 found in *Cirsium heterophyllum* herb.

| No    | $t_R$ , min | Compound                                                               | MF                                              | MSD, m/z      | IL |
|-------|-------------|------------------------------------------------------------------------|-------------------------------------------------|---------------|----|
| Ch-1  | 6.41        | Protocatechuic acid <i>O</i> -hexoside (Cn-3 isomer)                   | C <sub>13</sub> H <sub>16</sub> O <sub>9</sub>  | 315, 153      | 2  |
| Ch-2  | 6.81        | Protocatechuic acid 4- <i>O</i> -glucoside                             | C <sub>13</sub> H <sub>16</sub> O <sub>9</sub>  | 315, 153      | 1b |
| Ch-3  | 8.01        | 4- <i>O</i> -Caffeoyl quinic acid ( <i>trans</i> -)                    | C <sub>16</sub> H <sub>18</sub> O <sub>9</sub>  | 353, 179      | 1b |
| Ch-4  | 9.84        | 4- <i>O</i> -Caffeoyl quinic acid ( <i>cis</i> -)                      | C <sub>16</sub> H <sub>18</sub> O <sub>9</sub>  | 353, 179      | 1b |
| Ch-5  | 10.12       | 4- <i>O</i> - <i>p</i> -Coumaroyl quinic acid                          | C <sub>16</sub> H <sub>18</sub> O <sub>8</sub>  | 337, 163      | 1a |
| Ch-6  | 10.44       | 5- <i>O</i> -Caffeoyl quinic acid ( <i>trans</i> -)                    | C <sub>16</sub> H <sub>18</sub> O <sub>9</sub>  | 353, 179      | 1b |
| Ch-7  | 10.70       | 3- <i>O</i> -Caffeoyl quinic acid ( <i>trans</i> -)                    | C <sub>16</sub> H <sub>18</sub> O <sub>9</sub>  | 353, 179      | 1b |
| Ch-8  | 12.16       | 5- <i>O</i> -Caffeoyl quinic acid ( <i>cis</i> -)                      | C <sub>16</sub> H <sub>18</sub> O <sub>9</sub>  | 353, 179      | 1b |
| Ch-9  | 12.53       | 5- <i>O</i> - <i>p</i> -Coumaroyl quinic acid                          | C <sub>16</sub> H <sub>18</sub> O <sub>8</sub>  | 337, 163      | 1b |
| Ch-10 | 13.64       | Schaftoside (apigenin 6- <i>C</i> -glucoside-8- <i>C</i> -arabinoside) | C <sub>26</sub> H <sub>28</sub> O <sub>14</sub> | 563           | 1b |
| Ch-11 | 14.73       | 3- <i>O</i> - <i>p</i> -Coumaroyl quinic acid                          | C <sub>16</sub> H <sub>18</sub> O <sub>8</sub>  | 337, 163      | 1b |
| Ch-12 | 15.43       | Scolymoside (veronicastroside, luteolin 7- <i>O</i> -rutinoside)       | C <sub>27</sub> H <sub>30</sub> O <sub>15</sub> | 593, 447, 285 | 1b |
| Ch-13 | 15.98       | Cynaroside (luteolin 7- <i>O</i> -glucoside)                           | C <sub>21</sub> H <sub>20</sub> O <sub>11</sub> | 447, 285      | 1a |
| Ch-14 | 16.24       | Chrysoeriol 7- <i>O</i> -glucoside                                     | C <sub>22</sub> H <sub>22</sub> O <sub>11</sub> | 461, 299      | 1b |
| Ch-15 | 16.39       | Isorhoifolin (apigenin 7- <i>O</i> -rutinoside)                        | C <sub>27</sub> H <sub>30</sub> O <sub>14</sub> | 577, 431, 269 | 1b |
| Ch-16 | 16.67       | Chrysoeriol 7- <i>O</i> -(2''- <i>O</i> -acetyl)-glucoside             | C <sub>24</sub> H <sub>24</sub> O <sub>12</sub> | 503, 461, 299 | 2  |
| Ch-17 | 16.75       | 3,4-Di- <i>O</i> -caffeoyl quinic acid                                 | C <sub>25</sub> H <sub>24</sub> O <sub>12</sub> | 515, 353, 179 | 1b |
| Ch-18 | 16.93       | Dracocephaloside (luteolin 3'- <i>O</i> -glucoside)                    | C <sub>21</sub> H <sub>20</sub> O <sub>11</sub> | 447, 285      | 1a |
| Ch-19 | 17.02       | Chrysoeriol 7- <i>O</i> -(6''- <i>O</i> -acetyl)-glucoside             | C <sub>24</sub> H <sub>24</sub> O <sub>12</sub> | 503, 461, 299 | 1a |
| Ch-20 | 17.04       | 3,5-Di- <i>O</i> -caffeoyl quinic acid                                 | C <sub>25</sub> H <sub>24</sub> O <sub>12</sub> | 515, 353, 179 | 1b |
| Ch-21 | 17.16       | Cosmosiin (apigenin 7- <i>O</i> -glucoside)                            | C <sub>21</sub> H <sub>20</sub> O <sub>10</sub> | 431, 269      | 1b |
| Ch-22 | 17.43       | Chrysoeriol 4'- <i>O</i> -glucoside                                    | C <sub>22</sub> H <sub>22</sub> O <sub>11</sub> | 461, 299      | 1a |
| Ch-23 | 17.55       | 4,5-Di- <i>O</i> -caffeoyl quinic acid                                 | C <sub>25</sub> H <sub>24</sub> O <sub>12</sub> | 515, 353, 179 | 1b |
| Ch-24 | 17.57       | Acacetin 7- <i>O</i> -glucoside                                        | C <sub>22</sub> H <sub>22</sub> O <sub>10</sub> | 445, 283      | 1b |
| Ch-25 | 17.60       | Luteolin 4'- <i>O</i> -glucoside                                       | C <sub>21</sub> H <sub>20</sub> O <sub>11</sub> | 447, 285      | 1b |
| Ch-26 | 17.85       | Pectolinarigenin 7- <i>O</i> -glucoside                                | C <sub>22</sub> H <sub>24</sub> O <sub>11</sub> | 475, 313      | 1b |

\* Identification levels: (1) identified compounds after comparison of retention times, UV and mass-spectral data with previously isolated compounds (1a) or commercial reference standard (1b) or isolated in present work (1c); (2) putatively annotated compounds after comparison of retention times, UV and mass-spectral data with literature data.

**Table S11.** Retention times ( $t_R$ ), molecular formulas (MF), mass-spectral data for negative ionization (MSD), and identification level (IL) of compounds El-1–El-19 found in *Echinops davuricus* herb.

| No    | $t_R$ , min | Compound                                                                                                       | MF                                                            | MSD, m/z                | IL |
|-------|-------------|----------------------------------------------------------------------------------------------------------------|---------------------------------------------------------------|-------------------------|----|
| El-1  | 6.81        | Protocatechuic acid 4- <i>O</i> -glucoside                                                                     | C <sub>13</sub> H <sub>16</sub> O <sub>9</sub>                | 315, 153                | 1b |
| El-2  | 8.01        | 4- <i>O</i> -Caffeoyl quinic acid ( <i>trans</i> -)                                                            | C <sub>16</sub> H <sub>18</sub> O <sub>9</sub>                | 353, 179                | 1b |
| El-3  | 10.44       | 5- <i>O</i> -Caffeoyl quinic acid ( <i>trans</i> -)                                                            | C <sub>16</sub> H <sub>18</sub> O <sub>9</sub>                | 353, 179                | 1b |
| El-4  | 10.70       | 3- <i>O</i> -Caffeoyl quinic acid ( <i>trans</i> -)                                                            | C <sub>16</sub> H <sub>18</sub> O <sub>9</sub>                | 353, 179                | 1b |
| El-5  | 12.16       | 5- <i>O</i> -Caffeoyl quinic acid ( <i>cis</i> -)                                                              | C <sub>16</sub> H <sub>18</sub> O <sub>9</sub>                | 353, 179                | 1b |
| El-6  | 12.53       | 5- <i>O-p</i> -Coumaroyl quinic acid                                                                           | C <sub>16</sub> H <sub>18</sub> O <sub>8</sub>                | 337, 163                | 1b |
| El-7  | 14.73       | 3- <i>O-p</i> -Coumaroyl quinic acid                                                                           | C <sub>16</sub> H <sub>18</sub> O <sub>8</sub>                | 337, 163                | 1b |
| El-8  | 15.97       | Isoquercitrin (quercetin 3- <i>O</i> -glucoside)                                                               | C <sub>21</sub> H <sub>20</sub> O <sub>12</sub>               | 463, 301                | 1b |
| El-9  | 16.00       | Hyperoside (quercetin 3- <i>O</i> -galactoside)                                                                | C <sub>21</sub> H <sub>20</sub> O <sub>12</sub>               | 463, 301                | 1b |
| El-10 | 16.02       | Cynaroside (luteolin 7- <i>O</i> -glucoside)                                                                   | C <sub>21</sub> H <sub>20</sub> O <sub>11</sub>               | 447, 285                | 1b |
| El-11 | 16.24       | Chrysoeriol 7- <i>O</i> -glucoside                                                                             | C <sub>22</sub> H <sub>22</sub> O <sub>11</sub>               | 461, 299                | 1b |
| El-12 | 16.64       | 3,4-Di- <i>O</i> -caffeoyl quinic acid                                                                         | C <sub>25</sub> H <sub>24</sub> O <sub>12</sub>               | 515, 353, 179           | 1b |
| El-13 | 16.65       | Luteolin 5- <i>O</i> -glucoside                                                                                | C <sub>21</sub> H <sub>20</sub> O <sub>11</sub>               | 447, 285                | 1b |
| El-14 | 16.93       | Dracocephaloside (luteolin 3'- <i>O</i> -glucoside)                                                            | C <sub>21</sub> H <sub>20</sub> O <sub>11</sub>               | 447, 285                | 1a |
| El-15 | 17.04       | 3,5-Di- <i>O</i> -caffeoyl quinic acid                                                                         | C <sub>25</sub> H <sub>24</sub> O <sub>12</sub>               | 515, 353, 179           | 1b |
| El-16 | 17.55       | 4,5-Di- <i>O</i> -caffeoyl quinic acid                                                                         | C <sub>25</sub> H <sub>24</sub> O <sub>12</sub>               | 515, 353, 179           | 1b |
| El-17 | 23.06       | Echitin (apigenin 7- <i>O</i> -(2''- <i>O-p</i> -coumaroyl)-glucoside)                                         | C <sub>30</sub> H <sub>26</sub> O <sub>12</sub>               | 577, 431, 269           | 1a |
| El-18 | 23.29       | N <sup>1</sup> ,N <sup>5</sup> ,N <sup>10</sup> -Tri- <i>O</i> -( <i>EEE</i> )- <i>p</i> -coumaroyl-spermidine | C <sub>34</sub> H <sub>37</sub> N <sub>3</sub> O <sub>6</sub> | 582, 436, 290, 163, 144 | 1b |
| El-19 | 24.22       | Echinacin (apigenin 7- <i>O</i> -(6''- <i>O-p</i> -coumaroyl)-glucoside)                                       | C <sub>30</sub> H <sub>26</sub> O <sub>12</sub>               | 577, 431, 269           | 1b |

\* Identification levels: (1) identified compounds after comparison of retention times, UV and mass-spectral data with previously isolated compounds (1a) or commercial reference standard (1b) or isolated in present work (1c); (2) putatively annotated compounds after comparison of retention times, UV and mass-spectral data with literature data.

**Table S12.** Retention times ( $t_R$ ), molecular formulas (MF), mass-spectral data for negative ionization (MSD), and identification level (IL) of compounds Ic-1–Ic-25 found in *Ixeris chinensis* subsp. *versicolor* herb.

| No    | $t_R$ , min | Compound                                                                   | MF                                              | MSD, m/z                | IL |
|-------|-------------|----------------------------------------------------------------------------|-------------------------------------------------|-------------------------|----|
| Ic-1  | 8.01        | 4- <i>O</i> -Caffeoyl quinic acid ( <i>trans</i> -)                        | C <sub>16</sub> H <sub>18</sub> O <sub>9</sub>  | 353, 179                | 1b |
| Ic-2  | 8.87        | Cichoriin (esculetin 7- <i>O</i> -glucoside)                               | C <sub>15</sub> H <sub>16</sub> O <sub>9</sub>  | 339, 177                | 1b |
| Ic-3  | 9.15        | Caftaric acid isomer                                                       | C <sub>13</sub> H <sub>12</sub> O <sub>9</sub>  | 311, 179                | 1b |
| Ic-4  | 9.48        | Caftaric acid                                                              | C <sub>13</sub> H <sub>12</sub> O <sub>9</sub>  | 311, 179                | 1b |
| Ic-5  | 9.52        | Baimaside (quercetin 3- <i>O</i> -sophoroside)                             | C <sub>27</sub> H <sub>30</sub> O <sub>17</sub> | 625, 463, 301           | 1b |
| Ic-6  | 10.44       | 5- <i>O</i> -Caffeoyl quinic acid ( <i>trans</i> -)                        | C <sub>16</sub> H <sub>18</sub> O <sub>9</sub>  | 353, 179                | 1b |
| Ic-7  | 10.70       | 3- <i>O</i> -Caffeoyl quinic acid ( <i>trans</i> -)                        | C <sub>16</sub> H <sub>18</sub> O <sub>9</sub>  | 353, 179                | 1b |
| Ic-8  | 10.93       | Quercetin 3- <i>O</i> -gentiobioside                                       | C <sub>27</sub> H <sub>30</sub> O <sub>17</sub> | 625, 463, 301           | 1b |
| Ic-9  | 10.98       | Quercetin 3- <i>O</i> -(2''- <i>O</i> -arabinosyl)-glucoside               | C <sub>26</sub> H <sub>28</sub> O <sub>16</sub> | 595, 463, 301           | 2  |
| Ic-10 | 11.08       | Kaempferol di- <i>O</i> -hexoside                                          | C <sub>27</sub> H <sub>30</sub> O <sub>16</sub> | 609, 447, 285           | 2  |
| Ic-11 | 12.31       | Peltatoside (quercetin 3- <i>O</i> -(6''- <i>O</i> -arabinosyl)-glucoside) | C <sub>26</sub> H <sub>28</sub> O <sub>16</sub> | 595, 463, 301           | 1b |
| Ic-12 | 12.39       | 5- <i>O</i> -Caffeoyl quinic acid ( <i>cis</i> -)                          | C <sub>16</sub> H <sub>18</sub> O <sub>9</sub>  | 353, 179                | 1b |
| Ic-13 | 12.46       | Sophoraflavonolside (kaempferol 3- <i>O</i> -sophoroside)                  | C <sub>27</sub> H <sub>30</sub> O <sub>16</sub> | 609, 447, 285           | 1b |
| Ic-14 | 13.22       | Kaempferol 3- <i>O</i> -gentiobioside                                      | C <sub>27</sub> H <sub>30</sub> O <sub>16</sub> | 609, 447, 285           | 1b |
| Ic-15 | 14.32       | Coutaric acid                                                              | C <sub>13</sub> H <sub>12</sub> O <sub>8</sub>  | 295, 163                | 1b |
| Ic-16 | 14.66       | Calendoflavobioside (quercetin 3- <i>O</i> -neohesperidoside)              | C <sub>27</sub> H <sub>30</sub> O <sub>16</sub> | 609, 463, 285           | 1a |
| Ic-17 | 15.57       | Rutin (quercetin 3- <i>O</i> -rutinoside)                                  | C <sub>27</sub> H <sub>30</sub> O <sub>16</sub> | 609, 463, 285           | 1b |
| Ic-18 | 16.07       | Populnin (kaempferol 7- <i>O</i> -glucoside)                               | C <sub>21</sub> H <sub>20</sub> O <sub>11</sub> | 447, 285                | 1b |
| Ic-19 | 16.24       | Chrysoeriol 7- <i>O</i> -glucoside                                         | C <sub>22</sub> H <sub>22</sub> O <sub>11</sub> | 461, 299                | 1b |
| Ic-20 | 17.30       | Cichoric acid (di- <i>trans</i> isomer)                                    | C <sub>22</sub> H <sub>18</sub> O <sub>12</sub> | 473, 311, 179           | 1b |
| Ic-21 | 18.01       | Cichoric acid ( <i>cis-trans</i> isomer)                                   | C <sub>22</sub> H <sub>18</sub> O <sub>12</sub> | 473, 311, 179           | 2  |
| Ic-22 | 19.29       | <i>p</i> -Coumaroyl-caffeoyl-tartaric acid                                 | C <sub>22</sub> H <sub>18</sub> O <sub>11</sub> | 457, 311, 295, 179, 163 | 2  |
| Ic-23 | 19.91       | Feruloyl-caffeoyl-tartaric acid                                            | C <sub>23</sub> H <sub>20</sub> O <sub>12</sub> | 587, 425, 411, 193, 179 | 2  |

\* Identification levels: (1) identified compounds after comparison of retention times, UV and mass-spectral data with previously isolated compounds (1a) or commercial reference standard (1b) or isolated in present work (1c); (2) putatively annotated compounds after comparison of retention times, UV and mass-spectral data with literature data.

**Table S13.** Retention times ( $t_R$ ), molecular formulas (MF), mass-spectral data for negative ionization (MSD), and identification level (IL) of compounds Ls-1–Ls-41 found in *Lactuca sibirica* herb.

| No    | $t_R$ , min | Compound                                                 | MF                                                            | MSD, m/z                | IL |
|-------|-------------|----------------------------------------------------------|---------------------------------------------------------------|-------------------------|----|
| Ls-1  | 3.09        | Vanilloyl quinic acid (probably 1- <i>O</i> -isomer)     | C <sub>15</sub> H <sub>18</sub> O <sub>9</sub>                | 341, 167                | 2  |
| Ls-2  | 5.32        | Protocatechuic acid <i>O</i> -hexoside (Ls-4 isomer)     | C <sub>13</sub> H <sub>16</sub> O <sub>9</sub>                | 315, 153                | 2  |
| Ls-3  | 6.78        | Protocatechuic acid <i>O</i> -hexoside (Ls-4 isomer)     | C <sub>13</sub> H <sub>16</sub> O <sub>9</sub>                | 315, 153                | 2  |
| Ls-4  | 7.41        | Protocatechuic acid 4- <i>O</i> -glucoside               | C <sub>13</sub> H <sub>16</sub> O <sub>9</sub>                | 315, 153                | 1b |
| Ls-5  | 7.99        | Vanilloyl quinic acid (probably 4- <i>O</i> -isomer)     | C <sub>15</sub> H <sub>18</sub> O <sub>9</sub>                | 341, 167                | 2  |
| Ls-6  | 8.01        | 4- <i>O</i> -Caffeoyl quinic acid ( <i>trans</i> -)      | C <sub>16</sub> H <sub>18</sub> O <sub>9</sub>                | 353, 179                | 1b |
| Ls-7  | 8.10        | Vanilloyl quinic acid (probably 5- <i>O</i> -isomer)     | C <sub>15</sub> H <sub>18</sub> O <sub>9</sub>                | 341, 167                | 2  |
| Ls-8  | 9.48        | Caftaric acid                                            | C <sub>13</sub> H <sub>12</sub> O <sub>9</sub>                | 311, 179                | 1b |
| Ls-9  | 9.91        | Vanilloyl quinic acid (probably 5- <i>O</i> -isomer)     | C <sub>15</sub> H <sub>18</sub> O <sub>9</sub>                | 341, 167                | 2  |
| Ls-10 | 10.44       | 5- <i>O</i> -Caffeoyl quinic acid ( <i>trans</i> -)      | C <sub>16</sub> H <sub>18</sub> O <sub>9</sub>                | 353, 179                | 1b |
| Ls-11 | 10.70       | 3- <i>O</i> -Caffeoyl quinic acid ( <i>trans</i> -)      | C <sub>16</sub> H <sub>18</sub> O <sub>9</sub>                | 353, 179                | 1b |
| Ls-12 | 12.29       | Luteolin tri- <i>O</i> -hexoside                         | C <sub>33</sub> H <sub>40</sub> O <sub>21</sub>               | 771, 609, 447, 285      | 2  |
| Ls-13 | 12.39       | 5- <i>O</i> -Caffeoyl quinic acid ( <i>cis</i> -)        | C <sub>16</sub> H <sub>18</sub> O <sub>9</sub>                | 353, 179                | 1b |
| Ls-14 | 13.15       | Luteolin tri- <i>O</i> -hexoside                         | C <sub>33</sub> H <sub>40</sub> O <sub>21</sub>               | 771, 609, 447, 285      | 2  |
| Ls-15 | 14.63       | Divanilloyl quinic acid (probably 3,4-isomer)            | C <sub>23</sub> H <sub>24</sub> O <sub>12</sub>               | 491, 341, 167           | 2  |
| Ls-16 | 15.05       | Divanilloyl quinic acid (probably 3,5-isomer)            | C <sub>23</sub> H <sub>24</sub> O <sub>12</sub>               | 491, 341, 167           | 2  |
| Ls-17 | 15.53       | Kaempferol 3- <i>O</i> -neohesperidoside                 | C <sub>27</sub> H <sub>30</sub> O <sub>15</sub>               | 593, 447, 285           | 1b |
| Ls-18 | 15.58       | Rutin (quercetin 3- <i>O</i> -rutinoside)                | C <sub>27</sub> H <sub>30</sub> O <sub>16</sub>               | 609, 463, 301           | 1b |
| Ls-19 | 15.61       | Divanilloyl quinic acid (probably 4,5-isomer)            | C <sub>23</sub> H <sub>24</sub> O <sub>12</sub>               | 491, 341, 167           | 2  |
| Ls-20 | 16.08       | Cynaroside (luteolin 7- <i>O</i> -glucoside)             | C <sub>21</sub> H <sub>20</sub> O <sub>11</sub>               | 447, 285                | 1b |
| Ls-21 | 16.31       | Nicotiflorin (kaempferol 3- <i>O</i> -rutinoside)        | C <sub>27</sub> H <sub>30</sub> O <sub>15</sub>               | 593, 447, 285           | 1b |
| Ls-22 | 16.35       | Chrysoeriol 7- <i>O</i> -glucoside                       | C <sub>22</sub> H <sub>22</sub> O <sub>11</sub>               | 461, 299                | 1b |
| Ls-23 | 16.70       | 3,4-Di- <i>O</i> -caffeoyl quinic acid                   | C <sub>25</sub> H <sub>24</sub> O <sub>12</sub>               | 515, 353, 179           | 1b |
| Ls-24 | 16.73       | Quercetin 3- <i>O</i> -(6''- <i>O</i> -acetyl)-glucoside | C <sub>23</sub> H <sub>22</sub> O <sub>13</sub>               | 505, 463, 301           | 1a |
| Ls-25 | 16.97       | Dracocephaloside (luteolin 3'- <i>O</i> -glucoside)      | C <sub>21</sub> H <sub>20</sub> O <sub>11</sub>               | 447, 285                | 1a |
| Ls-26 | 17.11       | 3,5-Di- <i>O</i> -caffeoyl quinic acid                   | C <sub>25</sub> H <sub>24</sub> O <sub>12</sub>               | 515, 353, 179           | 1b |
| Ls-27 | 17.30       | Cichoric acid ( <i>di-trans</i> isomer)                  | C <sub>22</sub> H <sub>18</sub> O <sub>12</sub>               | 473, 311, 179           | 1b |
| Ls-28 | 17.32       | Quercetin 3- <i>O</i> -(3''- <i>O</i> -acetyl)-glucoside | C <sub>23</sub> H <sub>22</sub> O <sub>13</sub>               | 505, 463, 301           | 1a |
| Ls-29 | 17.60       | 4,5-Di- <i>O</i> -caffeoyl quinic acid                   | C <sub>25</sub> H <sub>24</sub> O <sub>12</sub>               | 515, 353, 179           | 1b |
| Ls-30 | 17.64       | Apigenin 7- <i>O</i> -glucuronide                        | C <sub>21</sub> H <sub>18</sub> O <sub>11</sub>               | 445, 269                | 1b |
| Ls-31 | 17.69       | Luteolin 4'- <i>O</i> -glucoside                         | C <sub>21</sub> H <sub>20</sub> O <sub>11</sub>               | 447, 285                | 1b |
| Ls-32 | 17.85       | Quercetin 3- <i>O</i> -(4''- <i>O</i> -acetyl)-glucoside | C <sub>23</sub> H <sub>22</sub> O <sub>13</sub>               | 505, 463, 301           | 1a |
| Ls-33 | 18.01       | Cichoric acid ( <i>cis-trans</i> isomer)                 | C <sub>22</sub> H <sub>18</sub> O <sub>12</sub>               | 473, 311, 179           | 2  |
| Ls-34 | 19.02       | Cichoric acid ( <i>cis-cis</i> isomer)                   | C <sub>22</sub> H <sub>18</sub> O <sub>12</sub>               | 473, 311, 179           | 2  |
| Ls-35 | 19.29       | <i>p</i> -Coumaroyl-caffeoyl-tartaric acid               | C <sub>22</sub> H <sub>18</sub> O <sub>11</sub>               | 457, 311, 295, 179, 163 | 2  |
| Ls-36 | 19.91       | Feruloyl-caffeoyl-tartaric acid                          | C <sub>23</sub> H <sub>20</sub> O <sub>12</sub>               | 587, 425, 411, 193, 179 | 2  |
| Ls-37 | 20.08       | <i>p</i> -Coumaroyl-caffeoyl-tartaric acid               | C <sub>22</sub> H <sub>18</sub> O <sub>11</sub>               | 457, 311, 295, 179, 163 | 2  |
| Ls-38 | 22.52       | Luteolin                                                 | C <sub>15</sub> H <sub>10</sub> O <sub>6</sub>                | 285                     | 1b |
| Ls-39 | 23.81       | Tetra- <i>O-p</i> -coumaroyl spermine                    | C <sub>46</sub> H <sub>50</sub> N <sub>4</sub> O <sub>8</sub> | 785, 639, 493, 347, 163 | 2  |
| Ls-40 | 23.87       | Tetra- <i>O-p</i> -coumaroyl spermine                    | C <sub>46</sub> H <sub>50</sub> N <sub>4</sub> O <sub>8</sub> | 785, 639, 493, 347, 163 | 2  |
| Ls-41 | 24.03       | Tetra- <i>O-p</i> -coumaroyl spermine                    | C <sub>46</sub> H <sub>50</sub> N <sub>4</sub> O <sub>8</sub> | 785, 639, 493, 347, 163 | 2  |
| Ls-42 | 24.17       | Tetra- <i>O-p</i> -coumaroyl spermine                    | C <sub>46</sub> H <sub>50</sub> N <sub>4</sub> O <sub>8</sub> | 785, 639, 493, 347, 163 | 2  |
| Ls-43 | 24.63       | Apigenin                                                 | C <sub>15</sub> H <sub>10</sub> O <sub>5</sub>                | 269                     | 1b |

\* Identification levels: (1) identified compounds after comparison of retention times, UV and mass-spectral data with previously isolated compounds (1a) or commercial reference standard (1b) or isolated in present work (1c); (2) putatively annotated compounds after comparison of retention times, UV and mass-spectral data with literature data.

**Table S14.** Synopsis of compounds found in six Asteraceae species.

| Compound                                                 | Aj | Cn | Ch | Ed | Ic | Ls |
|----------------------------------------------------------|----|----|----|----|----|----|
| <b>1. Benzoates</b>                                      |    |    |    |    |    |    |
| <b><u>1.1. Hydroxybenzoic acid glucosides</u></b>        |    |    |    |    |    |    |
| Protocatechuic acid <i>O</i> -hexoside                   |    | ✓  |    |    |    | ✓  |
| Protocatechuic acid <i>O</i> -hexoside                   |    | ✓  | ✓  |    |    | ✓  |
| Protocatechuic acid 4- <i>O</i> -glucoside               |    | ✓  | ✓  | ✓  |    | ✓  |
| <b><u>1.2. Hydroxybenzoyl quinic acids</u></b>           |    |    |    |    |    |    |
| Vanilloyl quinic acid (probably 1- <i>O</i> -isomer)     |    |    |    |    |    | ✓  |
| Vanilloyl quinic acid (probably 4- <i>O</i> -isomer)     |    |    |    |    |    | ✓  |
| Vanilloyl quinic acid (probably 5- <i>O</i> -isomer)     |    |    |    |    |    | ✓  |
| Vanilloyl quinic acid (probably 5- <i>O</i> -isomer)     |    |    |    |    |    | ✓  |
| Divanilloyl quinic acid (probably 3,4- <i>O</i> -isomer) |    |    |    |    |    | ✓  |
| Divanilloyl quinic acid (probably 3,5- <i>O</i> -isomer) |    |    |    |    |    | ✓  |
| Divanilloyl quinic acid (probably 4,5- <i>O</i> -isomer) |    |    |    |    |    | ✓  |
| <b>2. Coumarins</b>                                      |    |    |    |    |    |    |
| Esculetin 7- <i>O</i> -glucoside                         |    |    |    |    | ✓  |    |
| <b>3. Hydroxycinnamates</b>                              |    |    |    |    |    |    |
| <b><u>3.1. Caffeoyl glucaric acids</u></b>               |    |    |    |    |    |    |
| 3- <i>O</i> -Caffeoyl glucaric acid                      | ✓  |    |    |    |    |    |
| 4- <i>O</i> -Caffeoyl glucaric acid                      | ✓  | ✓  |    |    |    |    |
| 2- <i>O</i> -Caffeoyl glucaric acid                      | ✓  |    |    |    |    |    |
| 5- <i>O</i> -Caffeoyl glucaric acid                      | ✓  |    |    |    |    |    |
| <b><u>3.2. Caffeoyl tartaric acids</u></b>               |    |    |    |    |    |    |
| Caftaric acid isomer                                     |    |    |    |    | ✓  |    |
| Caftaric acid                                            |    |    |    |    | ✓  | ✓  |
| Cichoric acid ( <i>di-trans</i> isomer)                  |    |    |    |    | ✓  | ✓  |
| Cichoric acid ( <i>cis-trans</i> isomer)                 |    |    |    |    | ✓  | ✓  |
| Cichoric acid ( <i>cis-cis</i> isomer)                   |    |    |    |    |    | ✓  |
| <b><u>3.3. <i>p</i>-Coumaroyl tartaric acids</u></b>     |    |    |    |    |    |    |
| Coutaric acid                                            |    |    |    |    | ✓  |    |
| <b><u>3.4. Mixed tartaric acids</u></b>                  |    |    |    |    |    |    |
| <i>p</i> -Coumaroyl-caffeoyl-tartaric acid               |    |    |    |    | ✓  | ✓  |
| Feruloyl-caffeoyl-tartaric acid                          |    |    |    |    | ✓  | ✓  |
| <i>p</i> -Coumaroyl-caffeoyl-tartaric acid               |    |    |    |    |    | ✓  |
| <b><u>3.4. <i>p</i>-Coumaroyl quinic acids</u></b>       |    |    |    |    |    |    |
| 4- <i>O-p</i> -Coumaroyl quinic acid                     |    | ✓  | ✓  |    |    |    |
| 5- <i>O-p</i> -Coumaroyl quinic acid                     |    | ✓  | ✓  | ✓  |    |    |
| 3- <i>O-p</i> -Coumaroyl quinic acid                     |    | ✓  | ✓  | ✓  |    |    |
| <b><u>3.5. Caffeoyl quinic acids</u></b>                 |    |    |    |    |    |    |
| 4- <i>O</i> -Caffeoyl quinic acid ( <i>trans</i> -)      | ✓  |    | ✓  | ✓  | ✓  | ✓  |
| 4- <i>O</i> -Caffeoyl quinic acid ( <i>cis</i> -)        | ✓  |    | ✓  | ✓  |    |    |
| 5- <i>O</i> -Caffeoyl quinic acid ( <i>trans</i> -)      | ✓  | ✓  | ✓  | ✓  | ✓  | ✓  |
| 3- <i>O</i> -Caffeoyl quinic acid ( <i>trans</i> -)      | ✓  |    | ✓  | ✓  | ✓  | ✓  |
| 5- <i>O</i> -Caffeoyl quinic acid ( <i>cis</i> -)        | ✓  |    |    | ✓  | ✓  | ✓  |
| 3,4-Di- <i>O</i> -caffeoyl quinic acid                   | ✓  |    | ✓  | ✓  |    | ✓  |
| 3,5-Di- <i>O</i> -caffeoyl quinic acid                   | ✓  |    | ✓  | ✓  |    | ✓  |
| 4,5-Di- <i>O</i> -caffeoyl quinic acid                   | ✓  |    | ✓  | ✓  |    | ✓  |
| <b><u>3.6. Feruloyl quinic acids</u></b>                 |    |    |    |    |    |    |
| 4- <i>O</i> -Feruloyl quinic acid                        |    | ✓  |    |    | ✓  |    |
| 5- <i>O</i> -Feruloyl quinic acid                        |    | ✓  |    |    |    |    |
| 3- <i>O</i> -Feruloyl quinic acid                        |    | ✓  |    |    |    |    |



|                                                            |   |   |   |   |   |   |
|------------------------------------------------------------|---|---|---|---|---|---|
| <b>4. Flavonoids</b>                                       |   |   |   |   |   |   |
| <b>4.1. Apigenin O-glucosides</b>                          |   |   |   |   |   |   |
| Apigenin 7-O-glucoside                                     |   |   | ✓ |   |   |   |
| Apigenin 7-O-glucuronide                                   |   |   |   |   |   | ✓ |
| Apigenin 7-O-rutinoside                                    |   |   | ✓ |   |   |   |
| Apigenin 7-O-(2''-O-p-coumaroyl)-glucoside                 |   |   |   | ✓ |   |   |
| Apigenin 7-O-(6''-O-p-coumaroyl)-glucoside                 |   |   |   | ✓ |   |   |
| Apigenin di-O-hexoside-O-acetate                           |   | ✓ |   |   |   |   |
| Apigenin di-O-hexoside-O-acetate                           |   | ✓ |   |   |   |   |
| <b>4.2. Apigenin C-glucosides</b>                          |   |   |   |   |   |   |
| Apigenin 6-C-glucoside-8-C-arabinoside                     | ✓ |   | ✓ |   |   |   |
| <b>4.3. Acacetin O-glucosides</b>                          |   |   |   |   |   |   |
| Acacetin 7-O-glucoside                                     |   |   | ✓ |   |   |   |
| <b>4.4. Luteolin O-glucosides</b>                          |   |   |   |   |   |   |
| Luteolin 5-O-glucoside                                     |   |   |   | ✓ |   |   |
| Luteolin 7-O-glucoside                                     |   |   | ✓ | ✓ |   | ✓ |
| Luteolin 3'-O-glucoside                                    |   |   | ✓ | ✓ |   | ✓ |
| Luteolin 4'-O-glucoside                                    |   |   | ✓ |   |   | ✓ |
| Luteolin 7-O-rutinoside                                    |   |   | ✓ |   |   |   |
| Luteolin 7-O-(2''-O-glucosyl)-glucoside                    |   | ✓ |   |   |   |   |
| Luteolin 7-O-(2''-O-(6'''-O-acetyl)-glucosyl)-glucoside    |   | ✓ |   |   |   |   |
| Luteolin O-hexoside-O-pentoside                            |   | ✓ |   |   |   |   |
| Luteolin di-O-hexoside-O-acetate                           |   | ✓ |   |   |   |   |
| Luteolin tri-O-hexoside                                    |   |   |   |   |   | ✓ |
| Luteolin tri-O-hexoside                                    |   |   |   |   |   | ✓ |
| <b>4.5. Chrysoeriol O-glucosides</b>                       |   |   |   |   |   |   |
| Chrysoeriol 7-O-glucoside                                  |   |   | ✓ | ✓ | ✓ | ✓ |
| Chrysoeriol 4'-O-glucoside                                 |   |   | ✓ |   |   |   |
| Chrysoeriol 7-O-(2''-O-acetyl)-glucoside                   |   |   | ✓ |   |   |   |
| Chrysoeriol 7-O-(6''-O-acetyl)-glucoside                   |   |   | ✓ |   |   |   |
| Chrysoeriol 7-O-(2''-O-(6'''-O-acetyl)-glucosyl)-glucoside |   | ✓ |   |   |   |   |
| <b>4.6. 6-Hydroxyluteolin O-glucosides</b>                 |   |   |   |   |   |   |
| 6-Hydroxyluteolin di-O-hexoside                            | ✓ |   |   |   |   |   |
| <b>4.7. Pectolinarigenin O-glucosides</b>                  |   |   |   |   |   |   |
| Pectolinarigenin 7-O-glucoside                             |   |   | ✓ |   |   |   |
| <b>4.8. Kaempferol O-glucosides</b>                        |   |   |   |   |   |   |
| Kaempferol 7-O-glucoside                                   |   |   |   |   | ✓ |   |
| Kaempferol 3-O-neohesperidoside                            |   |   |   |   |   | ✓ |
| Kaempferol 3-O-rutinoside                                  |   |   |   |   |   | ✓ |
| Kaempferol 3-O-sophoroside                                 |   |   |   |   | ✓ |   |
| Kaempferol 3-O-gentiobioside                               |   |   |   |   | ✓ |   |
| Kaempferol di-O-hexoside                                   |   |   |   |   | ✓ |   |
| <b>4.9. Quercetin O-glucosides</b>                         |   |   |   |   |   |   |
| Quercetin 3-O-glucoside                                    |   |   |   | ✓ |   |   |
| Quercetin 3-O-galactoside                                  |   |   |   | ✓ |   |   |
| Quercetin 3-O-(2''-O-arabinosyl)-glucoside                 |   |   |   |   | ✓ |   |
| Quercetin 3-O-(6''-O-arabinosyl)-glucoside                 |   |   |   |   | ✓ |   |
| Quercetin 3-O-neohesperidoside                             | ✓ |   |   |   | ✓ |   |
| Quercetin 3-O-rungioside                                   | ✓ |   |   |   |   |   |
| Quercetin 3-O-(4''-O-rhamnosyl)-glucoside                  | ✓ |   |   |   |   |   |
| Quercetin 3-O-rutinoside                                   | ✓ |   |   |   | ✓ | ✓ |
| Quercetin 3-O-sophoroside                                  |   |   |   |   | ✓ |   |
| Quercetin 3-O-gentiobioside                                | ✓ |   |   |   | ✓ |   |

|                                                                                     |   |  |  |   |  |   |
|-------------------------------------------------------------------------------------|---|--|--|---|--|---|
| Quercetin 3-O-(2''-O-acetyl)-glucoside                                              | √ |  |  |   |  |   |
| Quercetin 3-O-(3''-O-acetyl)-glucoside                                              |   |  |  |   |  | √ |
| Quercetin 3-O-(4''-O-acetyl)-glucoside                                              | √ |  |  |   |  | √ |
| Quercetin 3-O-(6''-O-acetyl)-glucoside                                              | √ |  |  |   |  | √ |
| <u>4.10. Isorhamnetin O-glucosides</u>                                              |   |  |  |   |  |   |
| Isorhamnetin 3-O-(2''-O-acetyl)-glucoside                                           | √ |  |  |   |  |   |
| Isorhamnetin 3-O-(6''-O-acetyl)-glucoside                                           | √ |  |  |   |  |   |
| <u>4.11. Flavone aglycones</u>                                                      |   |  |  |   |  |   |
| Apigenin                                                                            |   |  |  |   |  | √ |
| Luteolin                                                                            |   |  |  |   |  | √ |
| Cirsiliol                                                                           | √ |  |  |   |  |   |
| Cirsilineol                                                                         | √ |  |  |   |  |   |
| <u>4.12. Flavonol aglycones</u>                                                     |   |  |  |   |  |   |
| Axillarin                                                                           | √ |  |  |   |  |   |
| Chrysosplenetin                                                                     | √ |  |  |   |  |   |
| 5. Phenylamines                                                                     |   |  |  |   |  |   |
| <u>5.1. Tri-O-p-coumaroyl spermines</u>                                             |   |  |  |   |  |   |
| Tri-O-p-coumaroyl spermine                                                          | √ |  |  |   |  |   |
| Tri-O-p-coumaroyl spermine                                                          | √ |  |  |   |  |   |
| Tri-O-p-coumaroyl spermine                                                          | √ |  |  |   |  |   |
| <u>5.2. Tetra-O-p-coumaroyl spermines</u>                                           |   |  |  |   |  |   |
| Tetra-O-p-coumaroyl spermines                                                       |   |  |  |   |  | √ |
| Tetra-O-p-coumaroyl spermine                                                        |   |  |  |   |  | √ |
| Tetra-O-p-coumaroyl spermine                                                        |   |  |  |   |  | √ |
| Tetra-O-p-coumaroyl spermine                                                        | √ |  |  |   |  | √ |
| <u>5.3. Tri-O-p-coumaroyl-spermidine</u>                                            |   |  |  |   |  |   |
| N <sup>1</sup> ,N <sup>5</sup> ,N <sup>10</sup> -Tri-O-(EEE)-p-coumaroyl-spermidine |   |  |  | √ |  |   |
